# Supplementary material
Source: publisher figshare collection journal article supplement (https://brill.figshare.com/ndownloader/files/27047264)
Supplement: Supplementary file 1 [file 27047264]

<?xml version="1.0" encoding="UTF-8"?><TreegraphDocument xmlns="http://bioinfweb.info/xmlns/xtg" xmlns:xsi="http://www.w3.org/2001/XMLSchema-instance" xsi:schemaLocation="http://bioinfweb.info/xmlns/xtg http://bioinfweb.info/xmlns/xtg/1.5.xsd"><GlobalFormats BgColor="#FFFFFF" BranchLengthScale="354.70984" ShowScaleBar="false" ShowRooted="true" AlignToSubtree="true" LabelsLeft="true"><DocMargin Left="2.0" Top="2.0" Right="2.0" Bottom="2.0"></DocMargin></GlobalFormats><NodeBranchDataAdapters><Adapter Name="info.bioinfweb.treegraph.nodeName" Purpose="info.bioinfweb.treegraph.defaultLeavesAdapter"></Adapter><Adapter Name="info.bioinfweb.treegraph.textLabelAdapter" ID="support" Purpose="info.bioinfweb.treegraph.defaultSupportAdapter"></Adapter></NodeBranchDataAdapters><Tree><Node Text="internalNode1" IsDecimal="false" UniqueName="itlm0lz1x8" TextColor="#000000" TextHeight="6.0" TextStyle="" FontFamily="Arial" DecimalFormat="#0.0#####" LocaleLang="en" LocaleCountry="" LocaleVariant="" LineColor="#000000" LineWidth="0.3" EdgeRadius="1.0"><LeafMargin Left="1.0" Top="0.3" Right="1.0" Bottom="0.3"></LeafMargin><Branch Length="0.0" LineColor="#000000" LineWidth="0.3" ConstantWidth="false" MinLength="4.0" MinSpaceAbove="0.0" MinSpaceBelow="0.0"><PieChartLabel TextColor="#000000" TextHeight="6.0" TextStyle="" FontFamily="Arial" DecimalFormat="#0.0#####" LocaleLang="en" LocaleCountry="" LocaleVariant="" LineColor="#000000" LineWidth="0.3" Width="6.0" Height="6.0" InternalLines="true" NullLines="false" ShowTitle="false" CaptionType="NONE" CaptionLinkType="STRAIGHT_LINES" Id="17" Above="true" LineNo="0" LinePos="0.0"><LabelMargin Left="1.0" Top="1.0" Right="1.0" Bottom="1.0"></LabelMargin><DataIds TextColor="#000000" TextStyle="" FontFamily="Arial" DecimalFormat="#0.0#####" LocaleLang="en" LocaleCountry="" LocaleVariant=""><DataId PieColor="#0000FF" PieCaption="">17.0</DataId><DataId PieColor="#FF0000" PieCaption="">17.1</DataId></DataIds></PieChartLabel><InvisibleData Id="17.1" Text="0.782726" IsDecimal="true"></InvisibleData><InvisibleData Id="17.0" Text="0.217274" IsDecimal="true"></InvisibleData></Branch><Node UniqueName="krg5vkwq85" TextColor="#000000" TextHeight="6.0" TextStyle="" FontFamily="Arial" DecimalFormat="#0.0#####" LocaleLang="en" LocaleCountry="" LocaleVariant="" LineColor="#000000" LineWidth="0.3" EdgeRadius="1.0"><LeafMargin Left="1.0" Top="0.3" Right="1.0" Bottom="0.3"></LeafMargin><Branch Length="0.039898825" LineColor="#000000" LineWidth="0.3" ConstantWidth="false" MinLength="4.0" MinSpaceAbove="0.0" MinSpaceBelow="0.0"></Branch><Node UniqueName="ytk5r2hkhq" TextColor="#000000" TextHeight="6.0" TextStyle="" FontFamily="Arial" DecimalFormat="#0.0#####" LocaleLang="en" LocaleCountry="" LocaleVariant="" LineColor="#000000" LineWidth="0.3" EdgeRadius="1.0"><LeafMargin Left="1.0" Top="0.3" Right="1.0" Bottom="0.3"></LeafMargin><Branch Length="0.02484799" LineColor="#000000" LineWidth="0.3" ConstantWidth="false" MinLength="4.0" MinSpaceAbove="0.0" MinSpaceBelow="0.0"></Branch><Node Text="Root" IsDecimal="false" UniqueName="32sv7hripp" TextColor="#000000" TextHeight="6.0" TextStyle="" FontFamily="Arial" DecimalFormat="#0.0#####" LocaleLang="en" LocaleCountry="" LocaleVariant="" LineColor="#000000" LineWidth="0.3" EdgeRadius="1.0"><LeafMargin Left="1.0" Top="0.3" Right="1.0" Bottom="0.3"></LeafMargin><Branch Length="0.1529653" LineColor="#000000" LineWidth="0.3" ConstantWidth="false" MinLength="4.0" MinSpaceAbove="0.0" MinSpaceBelow="0.0"><PieChartLabel TextColor="#000000" TextHeight="6.0" TextStyle="" FontFamily="Arial" DecimalFormat="#0.0#####" LocaleLang="en" LocaleCountry="" LocaleVariant="" LineColor="#000000" LineWidth="0.3" Width="6.0" Height="6.0" InternalLines="true" NullLines="false" ShowTitle="false" CaptionType="NONE" CaptionLinkType="STRAIGHT_LINES" Id="17" Above="true" LineNo="0" LinePos="0.0"><LabelMargin Left="1.0" Top="1.0" Right="1.0" Bottom="1.0"></LabelMargin><DataIds TextColor="#000000" TextStyle="" FontFamily="Arial" DecimalFormat="#0.0#####" LocaleLang="en" LocaleCountry="" LocaleVariant=""><DataId PieColor="#0000FF" PieCaption="">17.0</DataId><DataId PieColor="#FF0000" PieCaption="">17.1</DataId></DataIds></PieChartLabel><InvisibleData Id="17.1" Text="0.417266" IsDecimal="true"></InvisibleData><InvisibleData Id="17.0" Text="0.582734" IsDecimal="true"></InvisibleData></Branch></Node><Node Text="Ontholestes murinus JF889840 1" IsDecimal="false" UniqueName="0la74z4wml" TextColor="#000000" TextHeight="6.0" TextStyle="" FontFamily="Arial" DecimalFormat="#0.0#####" LocaleLang="en" LocaleCountry="" LocaleVariant="" LineColor="#000000" LineWidth="0.3" EdgeRadius="1.0"><LeafMargin Left="1.0" Top="0.3" Right="1.0" Bottom="0.3"></LeafMargin><Branch Length="0.09153701" LineColor="#000000" LineWidth="0.3" ConstantWidth="false" MinLength="4.0" MinSpaceAbove="0.0" MinSpaceBelow="0.0"></Branch></Node></Node><Node Text="Philonthus tenuicornis KU918645 1" IsDecimal="false" UniqueName="mvww4cgrwr" TextColor="#000000" TextHeight="6.0" TextStyle="" FontFamily="Arial" DecimalFormat="#0.0#####" LocaleLang="en" LocaleCountry="" LocaleVariant="" LineColor="#000000" LineWidth="0.3" EdgeRadius="1.0"><LeafMargin Left="1.0" Top="0.3" Right="1.0" Bottom="0.3"></LeafMargin><Branch Length="0.1401961" LineColor="#000000" LineWidth="0.3" ConstantWidth="false" MinLength="4.0" MinSpaceAbove="0.0" MinSpaceBelow="0.0"></Branch></Node></Node><Node Text="internalNode2" IsDecimal="false" UniqueName="lcprqz7c65" TextColor="#000000" TextHeight="6.0" TextStyle="" FontFamily="Arial" DecimalFormat="#0.0#####" LocaleLang="en" LocaleCountry="" LocaleVariant="" LineColor="#000000" LineWidth="0.3" EdgeRadius="1.0"><LeafMargin Left="1.0" Top="0.3" Right="1.0" Bottom="0.3"></LeafMargin><Branch Length="0.039898825" LineColor="#000000" LineWidth="0.3" ConstantWidth="false" MinLength="4.0" MinSpaceAbove="0.0" MinSpaceBelow="0.0"><PieChartLabel TextColor="#000000" TextHeight="6.0" TextStyle="" FontFamily="Arial" DecimalFormat="#0.0#####" LocaleLang="en" LocaleCountry="" LocaleVariant="" LineColor="#000000" LineWidth="0.3" Width="6.0" Height="6.0" InternalLines="true" NullLines="false" ShowTitle="false" CaptionType="NONE" CaptionLinkType="STRAIGHT_LINES" Id="17" Above="true" LineNo="0" LinePos="0.0"><LabelMargin Left="1.0" Top="1.0" Right="1.0" Bottom="1.0"></LabelMargin><DataIds TextColor="#000000" TextStyle="" FontFamily="Arial" DecimalFormat="#0.0#####" LocaleLang="en" LocaleCountry="" LocaleVariant=""><DataId PieColor="#0000FF" PieCaption="">17.0</DataId><DataId PieColor="#FF0000" PieCaption="">17.1</DataId></DataIds></PieChartLabel><InvisibleData Id="17.1" Text="0.685729" IsDecimal="true"></InvisibleData><InvisibleData Id="17.0" Text="0.314271" IsDecimal="true"></InvisibleData></Branch><Node Text="internalNode3" IsDecimal="false" UniqueName="6adqgg2e0n" TextColor="#000000" TextHeight="6.0" TextStyle="" FontFamily="Arial" DecimalFormat="#0.0#####" LocaleLang="en" LocaleCountry="" LocaleVariant="" LineColor="#000000" LineWidth="0.3" EdgeRadius="1.0"><LeafMargin Left="1.0" Top="0.3" Right="1.0" Bottom="0.3"></LeafMargin><Branch Length="0.03892916" LineColor="#000000" LineWidth="0.3" ConstantWidth="false" MinLength="4.0" MinSpaceAbove="0.0" MinSpaceBelow="0.0"><PieChartLabel TextColor="#000000" TextHeight="6.0" TextStyle="" FontFamily="Arial" DecimalFormat="#0.0#####" LocaleLang="en" LocaleCountry="" LocaleVariant="" LineColor="#000000" LineWidth="0.3" Width="6.0" Height="6.0" InternalLines="true" NullLines="false" ShowTitle="false" CaptionType="NONE" CaptionLinkType="STRAIGHT_LINES" Id="17" Above="true" LineNo="0" LinePos="0.0"><LabelMargin Left="1.0" Top="1.0" Right="1.0" Bottom="1.0"></LabelMargin><DataIds TextColor="#000000" TextStyle="" FontFamily="Arial" DecimalFormat="#0.0#####" LocaleLang="en" LocaleCountry="" LocaleVariant=""><DataId PieColor="#0000FF" PieCaption="">17.0</DataId><DataId PieColor="#FF0000" PieCaption="">17.1</DataId></DataIds></PieChartLabel><InvisibleData Id="17.1" Text="0.359343" IsDecimal="true"></InvisibleData><InvisibleData Id="17.0" Text="0.640657" IsDecimal="true"></InvisibleData></Branch><Node Text="Oxyporus P cyanipennis PrimKr01 19 186" IsDecimal="false" UniqueName="g30h9bht4a" TextColor="#000000" TextHeight="6.0" TextStyle="" FontFamily="Arial" DecimalFormat="#0.0#####" LocaleLang="en" LocaleCountry="" LocaleVariant="" LineColor="#000000" LineWidth="0.3" EdgeRadius="1.0"><LeafMargin Left="1.0" Top="0.3" Right="1.0" Bottom="0.3"></LeafMargin><Branch Length="0.05012421" LineColor="#000000" LineWidth="0.3" ConstantWidth="false" MinLength="4.0" MinSpaceAbove="0.0" MinSpaceBelow="0.0"></Branch></Node><Node Text="internalNode4" IsDecimal="false" UniqueName="5jqu6hkzc0" TextColor="#000000" TextHeight="6.0" TextStyle="" FontFamily="Arial" DecimalFormat="#0.0#####" LocaleLang="en" LocaleCountry="" LocaleVariant="" LineColor="#000000" LineWidth="0.3" EdgeRadius="1.0"><LeafMargin Left="1.0" Top="0.3" Right="1.0" Bottom="0.3"></LeafMargin><Branch Length="0.02066984" LineColor="#000000" LineWidth="0.3" ConstantWidth="false" MinLength="4.0" MinSpaceAbove="0.0" MinSpaceBelow="0.0"><PieChartLabel TextColor="#000000" TextHeight="6.0" TextStyle="" FontFamily="Arial" DecimalFormat="#0.0#####" LocaleLang="en" LocaleCountry="" LocaleVariant="" LineColor="#000000" LineWidth="0.3" Width="6.0" Height="6.0" InternalLines="true" NullLines="false" ShowTitle="false" CaptionType="NONE" CaptionLinkType="STRAIGHT_LINES" Id="17" Above="true" LineNo="0" LinePos="0.0"><LabelMargin Left="1.0" Top="1.0" Right="1.0" Bottom="1.0"></LabelMargin><DataIds TextColor="#000000" TextStyle="" FontFamily="Arial" DecimalFormat="#0.0#####" LocaleLang="en" LocaleCountry="" LocaleVariant=""><DataId PieColor="#0000FF" PieCaption="">17.0</DataId><DataId PieColor="#FF0000" PieCaption="">17.1</DataId></DataIds></PieChartLabel><InvisibleData Id="17.1" Text="0.036572" IsDecimal="true"></InvisibleData><InvisibleData Id="17.0" Text="0.963428" IsDecimal="true"></InvisibleData></Branch><Node Text="internalNode11" IsDecimal="false" UniqueName="8rjnj994f2" TextColor="#000000" TextHeight="6.0" TextStyle="" FontFamily="Arial" DecimalFormat="#0.0#####" LocaleLang="en" LocaleCountry="" LocaleVariant="" LineColor="#000000" LineWidth="0.3" EdgeRadius="1.0"><LeafMargin Left="1.0" Top="0.3" Right="1.0" Bottom="0.3"></LeafMargin><Branch Length="0.08931283" LineColor="#000000" LineWidth="0.3" ConstantWidth="false" MinLength="4.0" MinSpaceAbove="0.0" MinSpaceBelow="0.0"><PieChartLabel TextColor="#000000" TextHeight="6.0" TextStyle="" FontFamily="Arial" DecimalFormat="#0.0#####" LocaleLang="en" LocaleCountry="" LocaleVariant="" LineColor="#000000" LineWidth="0.3" Width="6.0" Height="6.0" InternalLines="true" NullLines="false" ShowTitle="false" CaptionType="NONE" CaptionLinkType="STRAIGHT_LINES" Id="17" Above="true" LineNo="0" LinePos="0.0"><LabelMargin Left="1.0" Top="1.0" Right="1.0" Bottom="1.0"></LabelMargin><DataIds TextColor="#000000" TextStyle="" FontFamily="Arial" DecimalFormat="#0.0#####" LocaleLang="en" LocaleCountry="" LocaleVariant=""><DataId PieColor="#0000FF" PieCaption="">17.0</DataId><DataId PieColor="#FF0000" PieCaption="">17.1</DataId></DataIds></PieChartLabel><InvisibleData Id="17.1" Text="3.0E-4" IsDecimal="true"></InvisibleData><InvisibleData Id="17.0" Text="0.9997" IsDecimal="true"></InvisibleData></Branch><Node Text="Oxyporus P melanocephalus CNUIC568" IsDecimal="false" UniqueName="twkmwfx6tn" TextColor="#000000" TextHeight="6.0" TextStyle="" FontFamily="Arial" DecimalFormat="#0.0#####" LocaleLang="en" LocaleCountry="" LocaleVariant="" LineColor="#000000" LineWidth="0.3" EdgeRadius="1.0"><LeafMargin Left="1.0" Top="0.3" Right="1.0" Bottom="0.3"></LeafMargin><Branch Length="0.003793082" LineColor="#000000" LineWidth="0.3" ConstantWidth="false" MinLength="4.0" MinSpaceAbove="0.0" MinSpaceBelow="0.0"></Branch></Node><Node Text="internalNode12" IsDecimal="false" UniqueName="s9pbycnet3" TextColor="#000000" TextHeight="6.0" TextStyle="" FontFamily="Arial" DecimalFormat="#0.0#####" LocaleLang="en" LocaleCountry="" LocaleVariant="" LineColor="#000000" LineWidth="0.3" EdgeRadius="1.0"><LeafMargin Left="1.0" Top="0.3" Right="1.0" Bottom="0.3"></LeafMargin><Branch Length="0.01058519" LineColor="#000000" LineWidth="0.3" ConstantWidth="false" MinLength="4.0" MinSpaceAbove="0.0" MinSpaceBelow="0.0"><PieChartLabel TextColor="#000000" TextHeight="6.0" TextStyle="" FontFamily="Arial" DecimalFormat="#0.0#####" LocaleLang="en" LocaleCountry="" LocaleVariant="" LineColor="#000000" LineWidth="0.3" Width="6.0" Height="6.0" InternalLines="true" NullLines="false" ShowTitle="false" CaptionType="NONE" CaptionLinkType="STRAIGHT_LINES" Id="17" Above="true" LineNo="0" LinePos="0.0"><LabelMargin Left="1.0" Top="1.0" Right="1.0" Bottom="1.0"></LabelMargin><DataIds TextColor="#000000" TextStyle="" FontFamily="Arial" DecimalFormat="#0.0#####" LocaleLang="en" LocaleCountry="" LocaleVariant=""><DataId PieColor="#0000FF" PieCaption="">17.0</DataId><DataId PieColor="#FF0000" PieCaption="">17.1</DataId></DataIds></PieChartLabel><InvisibleData Id="17.1" Text="2.2E-5" IsDecimal="true"></InvisibleData><InvisibleData Id="17.0" Text="0.999978" IsDecimal="true"></InvisibleData></Branch><Node Text="internalNode13" IsDecimal="false" UniqueName="u8xwgiw8bl" TextColor="#000000" TextHeight="6.0" TextStyle="" FontFamily="Arial" DecimalFormat="#0.0#####" LocaleLang="en" LocaleCountry="" LocaleVariant="" LineColor="#000000" LineWidth="0.3" EdgeRadius="1.0"><LeafMargin Left="1.0" Top="0.3" Right="1.0" Bottom="0.3"></LeafMargin><Branch Length="0.002403118" LineColor="#000000" LineWidth="0.3" ConstantWidth="false" MinLength="4.0" MinSpaceAbove="0.0" MinSpaceBelow="0.0"><PieChartLabel TextColor="#000000" TextHeight="6.0" TextStyle="" FontFamily="Arial" DecimalFormat="#0.0#####" LocaleLang="en" LocaleCountry="" LocaleVariant="" LineColor="#000000" LineWidth="0.3" Width="6.0" Height="6.0" InternalLines="true" NullLines="false" ShowTitle="false" CaptionType="NONE" CaptionLinkType="STRAIGHT_LINES" Id="17" Above="true" LineNo="0" LinePos="0.0"><LabelMargin Left="1.0" Top="1.0" Right="1.0" Bottom="1.0"></LabelMargin><DataIds TextColor="#000000" TextStyle="" FontFamily="Arial" DecimalFormat="#0.0#####" LocaleLang="en" LocaleCountry="" LocaleVariant=""><DataId PieColor="#0000FF" PieCaption="">17.0</DataId><DataId PieColor="#FF0000" PieCaption="">17.1</DataId></DataIds></PieChartLabel><InvisibleData Id="17.1" Text="8.0E-6" IsDecimal="true"></InvisibleData><InvisibleData Id="17.0" Text="0.999992" IsDecimal="true"></InvisibleData></Branch><Node Text="Oxyporus P melanocephalus GornTaezhFE18" IsDecimal="false" UniqueName="mc4cmegbbj" TextColor="#000000" TextHeight="6.0" TextStyle="" FontFamily="Arial" DecimalFormat="#0.0#####" LocaleLang="en" LocaleCountry="" LocaleVariant="" LineColor="#000000" LineWidth="0.3" EdgeRadius="1.0"><LeafMargin Left="1.0" Top="0.3" Right="1.0" Bottom="0.3"></LeafMargin><Branch Length="0.001027396" LineColor="#000000" LineWidth="0.3" ConstantWidth="false" MinLength="4.0" MinSpaceAbove="0.0" MinSpaceBelow="0.0"></Branch></Node><Node Text="Oxyporus P melanocephalus larvaGornTaezhFE18" IsDecimal="false" UniqueName="pe0y7r2p09" TextColor="#000000" TextHeight="6.0" TextStyle="" FontFamily="Arial" DecimalFormat="#0.0#####" LocaleLang="en" LocaleCountry="" LocaleVariant="" LineColor="#000000" LineWidth="0.3" EdgeRadius="1.0"><LeafMargin Left="1.0" Top="0.3" Right="1.0" Bottom="0.3"></LeafMargin><Branch Length="0.001047888" LineColor="#000000" LineWidth="0.3" ConstantWidth="false" MinLength="4.0" MinSpaceAbove="0.0" MinSpaceBelow="0.0"></Branch></Node></Node><Node Text="Oxyporus P melanocephalus ListvFE19 30" IsDecimal="false" UniqueName="isdsaxaywr" TextColor="#000000" TextHeight="6.0" TextStyle="" FontFamily="Arial" DecimalFormat="#0.0#####" LocaleLang="en" LocaleCountry="" LocaleVariant="" LineColor="#000000" LineWidth="0.3" EdgeRadius="1.0"><LeafMargin Left="1.0" Top="0.3" Right="1.0" Bottom="0.3"></LeafMargin><Branch Length="0.001237155" LineColor="#000000" LineWidth="0.3" ConstantWidth="false" MinLength="4.0" MinSpaceAbove="0.0" MinSpaceBelow="0.0"></Branch></Node></Node></Node><Node Text="internalNode5" IsDecimal="false" UniqueName="qvmigcrqgq" TextColor="#000000" TextHeight="6.0" TextStyle="" FontFamily="Arial" DecimalFormat="#0.0#####" LocaleLang="en" LocaleCountry="" LocaleVariant="" LineColor="#000000" LineWidth="0.3" EdgeRadius="1.0"><LeafMargin Left="1.0" Top="0.3" Right="1.0" Bottom="0.3"></LeafMargin><Branch Length="0.04482259" LineColor="#000000" LineWidth="0.3" ConstantWidth="false" MinLength="4.0" MinSpaceAbove="0.0" MinSpaceBelow="0.0"><PieChartLabel TextColor="#000000" TextHeight="6.0" TextStyle="" FontFamily="Arial" DecimalFormat="#0.0#####" LocaleLang="en" LocaleCountry="" LocaleVariant="" LineColor="#000000" LineWidth="0.3" Width="6.0" Height="6.0" InternalLines="true" NullLines="false" ShowTitle="false" CaptionType="NONE" CaptionLinkType="STRAIGHT_LINES" Id="17" Above="true" LineNo="0" LinePos="0.0"><LabelMargin Left="1.0" Top="1.0" Right="1.0" Bottom="1.0"></LabelMargin><DataIds TextColor="#000000" TextStyle="" FontFamily="Arial" DecimalFormat="#0.0#####" LocaleLang="en" LocaleCountry="" LocaleVariant=""><DataId PieColor="#0000FF" PieCaption="">17.0</DataId><DataId PieColor="#FF0000" PieCaption="">17.1</DataId></DataIds></PieChartLabel><InvisibleData Id="17.1" Text="0.029712" IsDecimal="true"></InvisibleData><InvisibleData Id="17.0" Text="0.970288" IsDecimal="true"></InvisibleData></Branch><Node Text="internalNode6" IsDecimal="false" UniqueName="vj65z00qe8" TextColor="#000000" TextHeight="6.0" TextStyle="" FontFamily="Arial" DecimalFormat="#0.0#####" LocaleLang="en" LocaleCountry="" LocaleVariant="" LineColor="#000000" LineWidth="0.3" EdgeRadius="1.0"><LeafMargin Left="1.0" Top="0.3" Right="1.0" Bottom="0.3"></LeafMargin><Branch Length="0.06337272" LineColor="#000000" LineWidth="0.3" ConstantWidth="false" MinLength="4.0" MinSpaceAbove="0.0" MinSpaceBelow="0.0"><PieChartLabel TextColor="#000000" TextHeight="6.0" TextStyle="" FontFamily="Arial" DecimalFormat="#0.0#####" LocaleLang="en" LocaleCountry="" LocaleVariant="" LineColor="#000000" LineWidth="0.3" Width="6.0" Height="6.0" InternalLines="true" NullLines="false" ShowTitle="false" CaptionType="NONE" CaptionLinkType="STRAIGHT_LINES" Id="17" Above="true" LineNo="0" LinePos="0.0"><LabelMargin Left="1.0" Top="1.0" Right="1.0" Bottom="1.0"></LabelMargin><DataIds TextColor="#000000" TextStyle="" FontFamily="Arial" DecimalFormat="#0.0#####" LocaleLang="en" LocaleCountry="" LocaleVariant=""><DataId PieColor="#0000FF" PieCaption="">17.0</DataId><DataId PieColor="#FF0000" PieCaption="">17.1</DataId></DataIds></PieChartLabel><InvisibleData Id="17.1" Text="0.001287" IsDecimal="true"></InvisibleData><InvisibleData Id="17.0" Text="0.998713" IsDecimal="true"></InvisibleData></Branch><Node Text="Oxyporus P dybowskii Altay19 34b 17" IsDecimal="false" UniqueName="ttspfr6qfo" TextColor="#000000" TextHeight="6.0" TextStyle="" FontFamily="Arial" DecimalFormat="#0.0#####" LocaleLang="en" LocaleCountry="" LocaleVariant="" LineColor="#000000" LineWidth="0.3" EdgeRadius="1.0"><LeafMargin Left="1.0" Top="0.3" Right="1.0" Bottom="0.3"></LeafMargin><Branch Length="0.01077851" LineColor="#000000" LineWidth="0.3" ConstantWidth="false" MinLength="4.0" MinSpaceAbove="0.0" MinSpaceBelow="0.0"></Branch></Node><Node Text="Oxyporus P dybowskii CNUIC567" IsDecimal="false" UniqueName="cwt8f0uu4r" TextColor="#000000" TextHeight="6.0" TextStyle="" FontFamily="Arial" DecimalFormat="#0.0#####" LocaleLang="en" LocaleCountry="" LocaleVariant="" LineColor="#000000" LineWidth="0.3" EdgeRadius="1.0"><LeafMargin Left="1.0" Top="0.3" Right="1.0" Bottom="0.3"></LeafMargin><Branch Length="0.01593421" LineColor="#000000" LineWidth="0.3" ConstantWidth="false" MinLength="4.0" MinSpaceAbove="0.0" MinSpaceBelow="0.0"></Branch></Node></Node><Node Text="internalNode7" IsDecimal="false" UniqueName="uin751a1in" TextColor="#000000" TextHeight="6.0" TextStyle="" FontFamily="Arial" DecimalFormat="#0.0#####" LocaleLang="en" LocaleCountry="" LocaleVariant="" LineColor="#000000" LineWidth="0.3" EdgeRadius="1.0"><LeafMargin Left="1.0" Top="0.3" Right="1.0" Bottom="0.3"></LeafMargin><Branch Length="0.06309511" LineColor="#000000" LineWidth="0.3" ConstantWidth="false" MinLength="4.0" MinSpaceAbove="0.0" MinSpaceBelow="0.0"><PieChartLabel TextColor="#000000" TextHeight="6.0" TextStyle="" FontFamily="Arial" DecimalFormat="#0.0#####" LocaleLang="en" LocaleCountry="" LocaleVariant="" LineColor="#000000" LineWidth="0.3" Width="6.0" Height="6.0" InternalLines="true" NullLines="false" ShowTitle="false" CaptionType="NONE" CaptionLinkType="STRAIGHT_LINES" Id="17" Above="true" LineNo="0" LinePos="0.0"><LabelMargin Left="1.0" Top="1.0" Right="1.0" Bottom="1.0"></LabelMargin><DataIds TextColor="#000000" TextStyle="" FontFamily="Arial" DecimalFormat="#0.0#####" LocaleLang="en" LocaleCountry="" LocaleVariant=""><DataId PieColor="#0000FF" PieCaption="">17.0</DataId><DataId PieColor="#FF0000" PieCaption="">17.1</DataId></DataIds></PieChartLabel><InvisibleData Id="17.1" Text="0.0" IsDecimal="true"></InvisibleData><InvisibleData Id="17.0" Text="1.0" IsDecimal="true"></InvisibleData></Branch><Node Text="internalNode8" IsDecimal="false" UniqueName="3gbkkzqo8l" TextColor="#000000" TextHeight="6.0" TextStyle="" FontFamily="Arial" DecimalFormat="#0.0#####" LocaleLang="en" LocaleCountry="" LocaleVariant="" LineColor="#000000" LineWidth="0.3" EdgeRadius="1.0"><LeafMargin Left="1.0" Top="0.3" Right="1.0" Bottom="0.3"></LeafMargin><Branch Length="0.004138651" LineColor="#000000" LineWidth="0.3" ConstantWidth="false" MinLength="4.0" MinSpaceAbove="0.0" MinSpaceBelow="0.0"><PieChartLabel TextColor="#000000" TextHeight="6.0" TextStyle="" FontFamily="Arial" DecimalFormat="#0.0#####" LocaleLang="en" LocaleCountry="" LocaleVariant="" LineColor="#000000" LineWidth="0.3" Width="6.0" Height="6.0" InternalLines="true" NullLines="false" ShowTitle="false" CaptionType="NONE" CaptionLinkType="STRAIGHT_LINES" Id="17" Above="true" LineNo="0" LinePos="0.0"><LabelMargin Left="1.0" Top="1.0" Right="1.0" Bottom="1.0"></LabelMargin><DataIds TextColor="#000000" TextStyle="" FontFamily="Arial" DecimalFormat="#0.0#####" LocaleLang="en" LocaleCountry="" LocaleVariant=""><DataId PieColor="#0000FF" PieCaption="">17.0</DataId><DataId PieColor="#FF0000" PieCaption="">17.1</DataId></DataIds></PieChartLabel><InvisibleData Id="17.1" Text="0.0" IsDecimal="true"></InvisibleData><InvisibleData Id="17.0" Text="1.0" IsDecimal="true"></InvisibleData></Branch><Node Text="Oxyporus occipitalis JF887772 1" IsDecimal="false" UniqueName="fesfwmwbgx" TextColor="#000000" TextHeight="6.0" TextStyle="" FontFamily="Arial" DecimalFormat="#0.0#####" LocaleLang="en" LocaleCountry="" LocaleVariant="" LineColor="#000000" LineWidth="0.3" EdgeRadius="1.0"><LeafMargin Left="1.0" Top="0.3" Right="1.0" Bottom="0.3"></LeafMargin><Branch Length="0.001125864" LineColor="#000000" LineWidth="0.3" ConstantWidth="false" MinLength="4.0" MinSpaceAbove="0.0" MinSpaceBelow="0.0"></Branch></Node><Node Text="Oxyporus occipitalis KM850520 1" IsDecimal="false" UniqueName="eiv6opylxy" TextColor="#000000" TextHeight="6.0" TextStyle="" FontFamily="Arial" DecimalFormat="#0.0#####" LocaleLang="en" LocaleCountry="" LocaleVariant="" LineColor="#000000" LineWidth="0.3" EdgeRadius="1.0"><LeafMargin Left="1.0" Top="0.3" Right="1.0" Bottom="0.3"></LeafMargin><Branch Length="0.001119014" LineColor="#000000" LineWidth="0.3" ConstantWidth="false" MinLength="4.0" MinSpaceAbove="0.0" MinSpaceBelow="0.0"></Branch></Node><Node Text="Oxyporus occipitalis5 KM842302" IsDecimal="false" UniqueName="zx08ezygoc" TextColor="#000000" TextHeight="6.0" TextStyle="" FontFamily="Arial" DecimalFormat="#0.0#####" LocaleLang="en" LocaleCountry="" LocaleVariant="" LineColor="#000000" LineWidth="0.3" EdgeRadius="1.0"><LeafMargin Left="1.0" Top="0.3" Right="1.0" Bottom="0.3"></LeafMargin><Branch Length="0.001050658" LineColor="#000000" LineWidth="0.3" ConstantWidth="false" MinLength="4.0" MinSpaceAbove="0.0" MinSpaceBelow="0.0"></Branch></Node></Node><Node Text="internalNode9" IsDecimal="false" UniqueName="mx1kh2daxr" TextColor="#000000" TextHeight="6.0" TextStyle="" FontFamily="Arial" DecimalFormat="#0.0#####" LocaleLang="en" LocaleCountry="" LocaleVariant="" LineColor="#000000" LineWidth="0.3" EdgeRadius="1.0"><LeafMargin Left="1.0" Top="0.3" Right="1.0" Bottom="0.3"></LeafMargin><Branch Length="0.002531579" LineColor="#000000" LineWidth="0.3" ConstantWidth="false" MinLength="4.0" MinSpaceAbove="0.0" MinSpaceBelow="0.0"><PieChartLabel TextColor="#000000" TextHeight="6.0" TextStyle="" FontFamily="Arial" DecimalFormat="#0.0#####" LocaleLang="en" LocaleCountry="" LocaleVariant="" LineColor="#000000" LineWidth="0.3" Width="6.0" Height="6.0" InternalLines="true" NullLines="false" ShowTitle="false" CaptionType="NONE" CaptionLinkType="STRAIGHT_LINES" Id="17" Above="true" LineNo="0" LinePos="0.0"><LabelMargin Left="1.0" Top="1.0" Right="1.0" Bottom="1.0"></LabelMargin><DataIds TextColor="#000000" TextStyle="" FontFamily="Arial" DecimalFormat="#0.0#####" LocaleLang="en" LocaleCountry="" LocaleVariant=""><DataId PieColor="#0000FF" PieCaption="">17.0</DataId><DataId PieColor="#FF0000" PieCaption="">17.1</DataId></DataIds></PieChartLabel><InvisibleData Id="17.1" Text="2.2E-5" IsDecimal="true"></InvisibleData><InvisibleData Id="17.0" Text="0.999978" IsDecimal="true"></InvisibleData></Branch><Node Text="internalNode10" IsDecimal="false" UniqueName="knyy660t1q" TextColor="#000000" TextHeight="6.0" TextStyle="" FontFamily="Arial" DecimalFormat="#0.0#####" LocaleLang="en" LocaleCountry="" LocaleVariant="" LineColor="#000000" LineWidth="0.3" EdgeRadius="1.0"><LeafMargin Left="1.0" Top="0.3" Right="1.0" Bottom="0.3"></LeafMargin><Branch Length="0.002528061" LineColor="#000000" LineWidth="0.3" ConstantWidth="false" MinLength="4.0" MinSpaceAbove="0.0" MinSpaceBelow="0.0"><PieChartLabel TextColor="#000000" TextHeight="6.0" TextStyle="" FontFamily="Arial" DecimalFormat="#0.0#####" LocaleLang="en" LocaleCountry="" LocaleVariant="" LineColor="#000000" LineWidth="0.3" Width="6.0" Height="6.0" InternalLines="true" NullLines="false" ShowTitle="false" CaptionType="NONE" CaptionLinkType="STRAIGHT_LINES" Id="17" Above="true" LineNo="0" LinePos="0.0"><LabelMargin Left="1.0" Top="1.0" Right="1.0" Bottom="1.0"></LabelMargin><DataIds TextColor="#000000" TextStyle="" FontFamily="Arial" DecimalFormat="#0.0#####" LocaleLang="en" LocaleCountry="" LocaleVariant=""><DataId PieColor="#0000FF" PieCaption="">17.0</DataId><DataId PieColor="#FF0000" PieCaption="">17.1</DataId></DataIds></PieChartLabel><InvisibleData Id="17.1" Text="9.0E-6" IsDecimal="true"></InvisibleData><InvisibleData Id="17.0" Text="0.999991" IsDecimal="true"></InvisibleData></Branch><Node Text="Oxyporus occipitalis KU875724 1" IsDecimal="false" UniqueName="ajuw32zn0s" TextColor="#000000" TextHeight="6.0" TextStyle="" FontFamily="Arial" DecimalFormat="#0.0#####" LocaleLang="en" LocaleCountry="" LocaleVariant="" LineColor="#000000" LineWidth="0.3" EdgeRadius="1.0"><LeafMargin Left="1.0" Top="0.3" Right="1.0" Bottom="0.3"></LeafMargin><Branch Length="0.001166645" LineColor="#000000" LineWidth="0.3" ConstantWidth="false" MinLength="4.0" MinSpaceAbove="0.0" MinSpaceBelow="0.0"></Branch></Node><Node Text="Oxyporus occipitalis1 KU875724" IsDecimal="false" UniqueName="59ns1eag90" TextColor="#000000" TextHeight="6.0" TextStyle="" FontFamily="Arial" DecimalFormat="#0.0#####" LocaleLang="en" LocaleCountry="" LocaleVariant="" LineColor="#000000" LineWidth="0.3" EdgeRadius="1.0"><LeafMargin Left="1.0" Top="0.3" Right="1.0" Bottom="0.3"></LeafMargin><Branch Length="0.001066982" LineColor="#000000" LineWidth="0.3" ConstantWidth="false" MinLength="4.0" MinSpaceAbove="0.0" MinSpaceBelow="0.0"></Branch></Node></Node><Node Text="Oxyporus occipitalis2 KU875723" IsDecimal="false" UniqueName="o9hw0k4uil" TextColor="#000000" TextHeight="6.0" TextStyle="" FontFamily="Arial" DecimalFormat="#0.0#####" LocaleLang="en" LocaleCountry="" LocaleVariant="" LineColor="#000000" LineWidth="0.3" EdgeRadius="1.0"><LeafMargin Left="1.0" Top="0.3" Right="1.0" Bottom="0.3"></LeafMargin><Branch Length="0.001142134" LineColor="#000000" LineWidth="0.3" ConstantWidth="false" MinLength="4.0" MinSpaceAbove="0.0" MinSpaceBelow="0.0"></Branch></Node></Node><Node Text="Oxyporus occipitalis3 KM850956" IsDecimal="false" UniqueName="jge2qhel20" TextColor="#000000" TextHeight="6.0" TextStyle="" FontFamily="Arial" DecimalFormat="#0.0#####" LocaleLang="en" LocaleCountry="" LocaleVariant="" LineColor="#000000" LineWidth="0.3" EdgeRadius="1.0"><LeafMargin Left="1.0" Top="0.3" Right="1.0" Bottom="0.3"></LeafMargin><Branch Length="0.001059797" LineColor="#000000" LineWidth="0.3" ConstantWidth="false" MinLength="4.0" MinSpaceAbove="0.0" MinSpaceBelow="0.0"></Branch></Node><Node Text="Oxyporus occipitalis4 KM843321" IsDecimal="false" UniqueName="izt6y7kx33" TextColor="#000000" TextHeight="6.0" TextStyle="" FontFamily="Arial" DecimalFormat="#0.0#####" LocaleLang="en" LocaleCountry="" LocaleVariant="" LineColor="#000000" LineWidth="0.3" EdgeRadius="1.0"><LeafMargin Left="1.0" Top="0.3" Right="1.0" Bottom="0.3"></LeafMargin><Branch Length="0.001034767" LineColor="#000000" LineWidth="0.3" ConstantWidth="false" MinLength="4.0" MinSpaceAbove="0.0" MinSpaceBelow="0.0"></Branch></Node><Node Text="Oxyporus occipitalis6 KM844801" IsDecimal="false" UniqueName="bionuo5o31" TextColor="#000000" TextHeight="6.0" TextStyle="" FontFamily="Arial" DecimalFormat="#0.0#####" LocaleLang="en" LocaleCountry="" LocaleVariant="" LineColor="#000000" LineWidth="0.3" EdgeRadius="1.0"><LeafMargin Left="1.0" Top="0.3" Right="1.0" Bottom="0.3"></LeafMargin><Branch Length="0.00538531" LineColor="#000000" LineWidth="0.3" ConstantWidth="false" MinLength="4.0" MinSpaceAbove="0.0" MinSpaceBelow="0.0"></Branch></Node><Node Text="Oxyporus occipitalis7 KM844575" IsDecimal="false" UniqueName="k0otq3qphw" TextColor="#000000" TextHeight="6.0" TextStyle="" FontFamily="Arial" DecimalFormat="#0.0#####" LocaleLang="en" LocaleCountry="" LocaleVariant="" LineColor="#000000" LineWidth="0.3" EdgeRadius="1.0"><LeafMargin Left="1.0" Top="0.3" Right="1.0" Bottom="0.3"></LeafMargin><Branch Length="0.00104352" LineColor="#000000" LineWidth="0.3" ConstantWidth="false" MinLength="4.0" MinSpaceAbove="0.0" MinSpaceBelow="0.0"></Branch></Node></Node></Node></Node></Node><Node Text="internalNode14" IsDecimal="false" UniqueName="4c9i1oq42c" TextColor="#000000" TextHeight="6.0" TextStyle="" FontFamily="Arial" DecimalFormat="#0.0#####" LocaleLang="en" LocaleCountry="" LocaleVariant="" LineColor="#000000" LineWidth="0.3" EdgeRadius="1.0"><LeafMargin Left="1.0" Top="0.3" Right="1.0" Bottom="0.3"></LeafMargin><Branch Length="0.07895561" LineColor="#000000" LineWidth="0.3" ConstantWidth="false" MinLength="4.0" MinSpaceAbove="0.0" MinSpaceBelow="0.0"><PieChartLabel TextColor="#000000" TextHeight="6.0" TextStyle="" FontFamily="Arial" DecimalFormat="#0.0#####" LocaleLang="en" LocaleCountry="" LocaleVariant="" LineColor="#000000" LineWidth="0.3" Width="6.0" Height="6.0" InternalLines="true" NullLines="false" ShowTitle="false" CaptionType="NONE" CaptionLinkType="STRAIGHT_LINES" Id="17" Above="true" LineNo="0" LinePos="0.0"><LabelMargin Left="1.0" Top="1.0" Right="1.0" Bottom="1.0"></LabelMargin><DataIds TextColor="#000000" TextStyle="" FontFamily="Arial" DecimalFormat="#0.0#####" LocaleLang="en" LocaleCountry="" LocaleVariant=""><DataId PieColor="#0000FF" PieCaption="">17.0</DataId><DataId PieColor="#FF0000" PieCaption="">17.1</DataId></DataIds></PieChartLabel><InvisibleData Id="17.1" Text="0.966893" IsDecimal="true"></InvisibleData><InvisibleData Id="17.0" Text="0.033107" IsDecimal="true"></InvisibleData></Branch><Node Text="internalNode53" IsDecimal="false" UniqueName="7mowhtkqkf" TextColor="#000000" TextHeight="6.0" TextStyle="" FontFamily="Arial" DecimalFormat="#0.0#####" LocaleLang="en" LocaleCountry="" LocaleVariant="" LineColor="#000000" LineWidth="0.3" EdgeRadius="1.0"><LeafMargin Left="1.0" Top="0.3" Right="1.0" Bottom="0.3"></LeafMargin><Branch Length="0.07839028" LineColor="#000000" LineWidth="0.3" ConstantWidth="false" MinLength="4.0" MinSpaceAbove="0.0" MinSpaceBelow="0.0"><PieChartLabel TextColor="#000000" TextHeight="6.0" TextStyle="" FontFamily="Arial" DecimalFormat="#0.0#####" LocaleLang="en" LocaleCountry="" LocaleVariant="" LineColor="#000000" LineWidth="0.3" Width="6.0" Height="6.0" InternalLines="true" NullLines="false" ShowTitle="false" CaptionType="NONE" CaptionLinkType="STRAIGHT_LINES" Id="17" Above="true" LineNo="0" LinePos="0.0"><LabelMargin Left="1.0" Top="1.0" Right="1.0" Bottom="1.0"></LabelMargin><DataIds TextColor="#000000" TextStyle="" FontFamily="Arial" DecimalFormat="#0.0#####" LocaleLang="en" LocaleCountry="" LocaleVariant=""><DataId PieColor="#0000FF" PieCaption="">17.0</DataId><DataId PieColor="#FF0000" PieCaption="">17.1</DataId></DataIds></PieChartLabel><InvisibleData Id="17.1" Text="1.0" IsDecimal="true"></InvisibleData><InvisibleData Id="17.0" Text="0.0" IsDecimal="true"></InvisibleData></Branch><Node Text="Oxyporus mannerheimii AnisimFE19 06" IsDecimal="false" UniqueName="t9514x9tob" TextColor="#000000" TextHeight="6.0" TextStyle="" FontFamily="Arial" DecimalFormat="#0.0#####" LocaleLang="en" LocaleCountry="" LocaleVariant="" LineColor="#000000" LineWidth="0.3" EdgeRadius="1.0"><LeafMargin Left="1.0" Top="0.3" Right="1.0" Bottom="0.3"></LeafMargin><Branch Length="0.001022218" LineColor="#000000" LineWidth="0.3" ConstantWidth="false" MinLength="4.0" MinSpaceAbove="0.0" MinSpaceBelow="0.0"></Branch></Node><Node Text="Oxyporus mannerheimii Sverdl19 16" IsDecimal="false" UniqueName="gkl5gifj0s" TextColor="#000000" TextHeight="6.0" TextStyle="" FontFamily="Arial" DecimalFormat="#0.0#####" LocaleLang="en" LocaleCountry="" LocaleVariant="" LineColor="#000000" LineWidth="0.3" EdgeRadius="1.0"><LeafMargin Left="1.0" Top="0.3" Right="1.0" Bottom="0.3"></LeafMargin><Branch Length="0.00103873" LineColor="#000000" LineWidth="0.3" ConstantWidth="false" MinLength="4.0" MinSpaceAbove="0.0" MinSpaceBelow="0.0"></Branch></Node><Node Text="Oxyporus mannerheimii TolmachLO18 26" IsDecimal="false" UniqueName="3fg9j54fl4" TextColor="#000000" TextHeight="6.0" TextStyle="" FontFamily="Arial" DecimalFormat="#0.0#####" LocaleLang="en" LocaleCountry="" LocaleVariant="" LineColor="#000000" LineWidth="0.3" EdgeRadius="1.0"><LeafMargin Left="1.0" Top="0.3" Right="1.0" Bottom="0.3"></LeafMargin><Branch Length="0.001024498" LineColor="#000000" LineWidth="0.3" ConstantWidth="false" MinLength="4.0" MinSpaceAbove="0.0" MinSpaceBelow="0.0"></Branch></Node></Node><Node Text="internalNode15" IsDecimal="false" UniqueName="sfwbi8qush" TextColor="#000000" TextHeight="6.0" TextStyle="" FontFamily="Arial" DecimalFormat="#0.0#####" LocaleLang="en" LocaleCountry="" LocaleVariant="" LineColor="#000000" LineWidth="0.3" EdgeRadius="1.0"><LeafMargin Left="1.0" Top="0.3" Right="1.0" Bottom="0.3"></LeafMargin><Branch Length="0.02158817" LineColor="#000000" LineWidth="0.3" ConstantWidth="false" MinLength="4.0" MinSpaceAbove="0.0" MinSpaceBelow="0.0"><PieChartLabel TextColor="#000000" TextHeight="6.0" TextStyle="" FontFamily="Arial" DecimalFormat="#0.0#####" LocaleLang="en" LocaleCountry="" LocaleVariant="" LineColor="#000000" LineWidth="0.3" Width="6.0" Height="6.0" InternalLines="true" NullLines="false" ShowTitle="false" CaptionType="NONE" CaptionLinkType="STRAIGHT_LINES" Id="17" Above="true" LineNo="0" LinePos="0.0"><LabelMargin Left="1.0" Top="1.0" Right="1.0" Bottom="1.0"></LabelMargin><DataIds TextColor="#000000" TextStyle="" FontFamily="Arial" DecimalFormat="#0.0#####" LocaleLang="en" LocaleCountry="" LocaleVariant=""><DataId PieColor="#0000FF" PieCaption="">17.0</DataId><DataId PieColor="#FF0000" PieCaption="">17.1</DataId></DataIds></PieChartLabel><InvisibleData Id="17.1" Text="0.944104" IsDecimal="true"></InvisibleData><InvisibleData Id="17.0" Text="0.055896" IsDecimal="true"></InvisibleData></Branch><Node Text="internalNode44" IsDecimal="false" UniqueName="ufc8zavvhd" TextColor="#000000" TextHeight="6.0" TextStyle="" FontFamily="Arial" DecimalFormat="#0.0#####" LocaleLang="en" LocaleCountry="" LocaleVariant="" LineColor="#000000" LineWidth="0.3" EdgeRadius="1.0"><LeafMargin Left="1.0" Top="0.3" Right="1.0" Bottom="0.3"></LeafMargin><Branch Length="0.03728185" LineColor="#000000" LineWidth="0.3" ConstantWidth="false" MinLength="4.0" MinSpaceAbove="0.0" MinSpaceBelow="0.0"><PieChartLabel TextColor="#000000" TextHeight="6.0" TextStyle="" FontFamily="Arial" DecimalFormat="#0.0#####" LocaleLang="en" LocaleCountry="" LocaleVariant="" LineColor="#000000" LineWidth="0.3" Width="6.0" Height="6.0" InternalLines="true" NullLines="false" ShowTitle="false" CaptionType="NONE" CaptionLinkType="STRAIGHT_LINES" Id="17" Above="true" LineNo="0" LinePos="0.0"><LabelMargin Left="1.0" Top="1.0" Right="1.0" Bottom="1.0"></LabelMargin><DataIds TextColor="#000000" TextStyle="" FontFamily="Arial" DecimalFormat="#0.0#####" LocaleLang="en" LocaleCountry="" LocaleVariant=""><DataId PieColor="#0000FF" PieCaption="">17.0</DataId><DataId PieColor="#FF0000" PieCaption="">17.1</DataId></DataIds></PieChartLabel><InvisibleData Id="17.1" Text="0.657987" IsDecimal="true"></InvisibleData><InvisibleData Id="17.0" Text="0.342013" IsDecimal="true"></InvisibleData></Branch><Node Text="internalNode45" IsDecimal="false" UniqueName="yh60qypwy9" TextColor="#000000" TextHeight="6.0" TextStyle="" FontFamily="Arial" DecimalFormat="#0.0#####" LocaleLang="en" LocaleCountry="" LocaleVariant="" LineColor="#000000" LineWidth="0.3" EdgeRadius="1.0"><LeafMargin Left="1.0" Top="0.3" Right="1.0" Bottom="0.3"></LeafMargin><Branch Length="0.02315972" LineColor="#000000" LineWidth="0.3" ConstantWidth="false" MinLength="4.0" MinSpaceAbove="0.0" MinSpaceBelow="0.0"><PieChartLabel TextColor="#000000" TextHeight="6.0" TextStyle="" FontFamily="Arial" DecimalFormat="#0.0#####" LocaleLang="en" LocaleCountry="" LocaleVariant="" LineColor="#000000" LineWidth="0.3" Width="6.0" Height="6.0" InternalLines="true" NullLines="false" ShowTitle="false" CaptionType="NONE" CaptionLinkType="STRAIGHT_LINES" Id="17" Above="true" LineNo="0" LinePos="0.0"><LabelMargin Left="1.0" Top="1.0" Right="1.0" Bottom="1.0"></LabelMargin><DataIds TextColor="#000000" TextStyle="" FontFamily="Arial" DecimalFormat="#0.0#####" LocaleLang="en" LocaleCountry="" LocaleVariant=""><DataId PieColor="#0000FF" PieCaption="">17.0</DataId><DataId PieColor="#FF0000" PieCaption="">17.1</DataId></DataIds></PieChartLabel><InvisibleData Id="17.1" Text="0.999342" IsDecimal="true"></InvisibleData><InvisibleData Id="17.0" Text="6.58E-4" IsDecimal="true"></InvisibleData></Branch><Node Text="internalNode46" IsDecimal="false" UniqueName="pctytx80s3" TextColor="#000000" TextHeight="6.0" TextStyle="" FontFamily="Arial" DecimalFormat="#0.0#####" LocaleLang="en" LocaleCountry="" LocaleVariant="" LineColor="#000000" LineWidth="0.3" EdgeRadius="1.0"><LeafMargin Left="1.0" Top="0.3" Right="1.0" Bottom="0.3"></LeafMargin><Branch Length="0.006573462" LineColor="#000000" LineWidth="0.3" ConstantWidth="false" MinLength="4.0" MinSpaceAbove="0.0" MinSpaceBelow="0.0"><PieChartLabel TextColor="#000000" TextHeight="6.0" TextStyle="" FontFamily="Arial" DecimalFormat="#0.0#####" LocaleLang="en" LocaleCountry="" LocaleVariant="" LineColor="#000000" LineWidth="0.3" Width="6.0" Height="6.0" InternalLines="true" NullLines="false" ShowTitle="false" CaptionType="NONE" CaptionLinkType="STRAIGHT_LINES" Id="17" Above="true" LineNo="0" LinePos="0.0"><LabelMargin Left="1.0" Top="1.0" Right="1.0" Bottom="1.0"></LabelMargin><DataIds TextColor="#000000" TextStyle="" FontFamily="Arial" DecimalFormat="#0.0#####" LocaleLang="en" LocaleCountry="" LocaleVariant=""><DataId PieColor="#0000FF" PieCaption="">17.0</DataId><DataId PieColor="#FF0000" PieCaption="">17.1</DataId></DataIds></PieChartLabel><InvisibleData Id="17.1" Text="0.999803" IsDecimal="true"></InvisibleData><InvisibleData Id="17.0" Text="1.97E-4" IsDecimal="true"></InvisibleData></Branch><Node Text="internalNode47" IsDecimal="false" UniqueName="oj73bxrzi7" TextColor="#000000" TextHeight="6.0" TextStyle="" FontFamily="Arial" DecimalFormat="#0.0#####" LocaleLang="en" LocaleCountry="" LocaleVariant="" LineColor="#000000" LineWidth="0.3" EdgeRadius="1.0"><LeafMargin Left="1.0" Top="0.3" Right="1.0" Bottom="0.3"></LeafMargin><Branch Length="0.002827889" LineColor="#000000" LineWidth="0.3" ConstantWidth="false" MinLength="4.0" MinSpaceAbove="0.0" MinSpaceBelow="0.0"><PieChartLabel TextColor="#000000" TextHeight="6.0" TextStyle="" FontFamily="Arial" DecimalFormat="#0.0#####" LocaleLang="en" LocaleCountry="" LocaleVariant="" LineColor="#000000" LineWidth="0.3" Width="6.0" Height="6.0" InternalLines="true" NullLines="false" ShowTitle="false" CaptionType="NONE" CaptionLinkType="STRAIGHT_LINES" Id="17" Above="true" LineNo="0" LinePos="0.0"><LabelMargin Left="1.0" Top="1.0" Right="1.0" Bottom="1.0"></LabelMargin><DataIds TextColor="#000000" TextStyle="" FontFamily="Arial" DecimalFormat="#0.0#####" LocaleLang="en" LocaleCountry="" LocaleVariant=""><DataId PieColor="#0000FF" PieCaption="">17.0</DataId><DataId PieColor="#FF0000" PieCaption="">17.1</DataId></DataIds></PieChartLabel><InvisibleData Id="17.1" Text="0.999938" IsDecimal="true"></InvisibleData><InvisibleData Id="17.0" Text="6.2E-5" IsDecimal="true"></InvisibleData></Branch><Node Text="internalNode48" IsDecimal="false" UniqueName="1o035bm7vk" TextColor="#000000" TextHeight="6.0" TextStyle="" FontFamily="Arial" DecimalFormat="#0.0#####" LocaleLang="en" LocaleCountry="" LocaleVariant="" LineColor="#000000" LineWidth="0.3" EdgeRadius="1.0"><LeafMargin Left="1.0" Top="0.3" Right="1.0" Bottom="0.3"></LeafMargin><Branch Length="0.002716934" LineColor="#000000" LineWidth="0.3" ConstantWidth="false" MinLength="4.0" MinSpaceAbove="0.0" MinSpaceBelow="0.0"><PieChartLabel TextColor="#000000" TextHeight="6.0" TextStyle="" FontFamily="Arial" DecimalFormat="#0.0#####" LocaleLang="en" LocaleCountry="" LocaleVariant="" LineColor="#000000" LineWidth="0.3" Width="6.0" Height="6.0" InternalLines="true" NullLines="false" ShowTitle="false" CaptionType="NONE" CaptionLinkType="STRAIGHT_LINES" Id="17" Above="true" LineNo="0" LinePos="0.0"><LabelMargin Left="1.0" Top="1.0" Right="1.0" Bottom="1.0"></LabelMargin><DataIds TextColor="#000000" TextStyle="" FontFamily="Arial" DecimalFormat="#0.0#####" LocaleLang="en" LocaleCountry="" LocaleVariant=""><DataId PieColor="#0000FF" PieCaption="">17.0</DataId><DataId PieColor="#FF0000" PieCaption="">17.1</DataId></DataIds></PieChartLabel><InvisibleData Id="17.1" Text="0.999968" IsDecimal="true"></InvisibleData><InvisibleData Id="17.0" Text="3.2E-5" IsDecimal="true"></InvisibleData></Branch><Node Text="Oxyporus aequicollis PogranFE19 41" IsDecimal="false" UniqueName="k16zxs7h93" TextColor="#000000" TextHeight="6.0" TextStyle="" FontFamily="Arial" DecimalFormat="#0.0#####" LocaleLang="en" LocaleCountry="" LocaleVariant="" LineColor="#000000" LineWidth="0.3" EdgeRadius="1.0"><LeafMargin Left="1.0" Top="0.3" Right="1.0" Bottom="0.3"></LeafMargin><Branch Length="0.001051766" LineColor="#000000" LineWidth="0.3" ConstantWidth="false" MinLength="4.0" MinSpaceAbove="0.0" MinSpaceBelow="0.0"></Branch></Node><Node Text="Oxyporus basicornis AnisimFE19 51" IsDecimal="false" UniqueName="a1vjeh1gep" TextColor="#000000" TextHeight="6.0" TextStyle="" FontFamily="Arial" DecimalFormat="#0.0#####" LocaleLang="en" LocaleCountry="" LocaleVariant="" LineColor="#000000" LineWidth="0.3" EdgeRadius="1.0"><LeafMargin Left="1.0" Top="0.3" Right="1.0" Bottom="0.3"></LeafMargin><Branch Length="0.002506712" LineColor="#000000" LineWidth="0.3" ConstantWidth="false" MinLength="4.0" MinSpaceAbove="0.0" MinSpaceBelow="0.0"></Branch></Node></Node><Node Text="Oxyporus germanus dark AnisimFE19 18" IsDecimal="false" UniqueName="rccesyirzj" TextColor="#000000" TextHeight="6.0" TextStyle="" FontFamily="Arial" DecimalFormat="#0.0#####" LocaleLang="en" LocaleCountry="" LocaleVariant="" LineColor="#000000" LineWidth="0.3" EdgeRadius="1.0"><LeafMargin Left="1.0" Top="0.3" Right="1.0" Bottom="0.3"></LeafMargin><Branch Length="0.001902456" LineColor="#000000" LineWidth="0.3" ConstantWidth="false" MinLength="4.0" MinSpaceAbove="0.0" MinSpaceBelow="0.0"></Branch></Node></Node><Node Text="internalNode49" IsDecimal="false" UniqueName="vk6b0cw6f6" TextColor="#000000" TextHeight="6.0" TextStyle="" FontFamily="Arial" DecimalFormat="#0.0#####" LocaleLang="en" LocaleCountry="" LocaleVariant="" LineColor="#000000" LineWidth="0.3" EdgeRadius="1.0"><LeafMargin Left="1.0" Top="0.3" Right="1.0" Bottom="0.3"></LeafMargin><Branch Length="0.005759409" LineColor="#000000" LineWidth="0.3" ConstantWidth="false" MinLength="4.0" MinSpaceAbove="0.0" MinSpaceBelow="0.0"><PieChartLabel TextColor="#000000" TextHeight="6.0" TextStyle="" FontFamily="Arial" DecimalFormat="#0.0#####" LocaleLang="en" LocaleCountry="" LocaleVariant="" LineColor="#000000" LineWidth="0.3" Width="6.0" Height="6.0" InternalLines="true" NullLines="false" ShowTitle="false" CaptionType="NONE" CaptionLinkType="STRAIGHT_LINES" Id="17" Above="true" LineNo="0" LinePos="0.0"><LabelMargin Left="1.0" Top="1.0" Right="1.0" Bottom="1.0"></LabelMargin><DataIds TextColor="#000000" TextStyle="" FontFamily="Arial" DecimalFormat="#0.0#####" LocaleLang="en" LocaleCountry="" LocaleVariant=""><DataId PieColor="#0000FF" PieCaption="">17.0</DataId><DataId PieColor="#FF0000" PieCaption="">17.1</DataId></DataIds></PieChartLabel><InvisibleData Id="17.1" Text="0.999999" IsDecimal="true"></InvisibleData><InvisibleData Id="17.0" Text="1.0E-6" IsDecimal="true"></InvisibleData></Branch><Node Text="Oxyporus germanus2 CNUIC597" IsDecimal="false" UniqueName="zifdlph0mi" TextColor="#000000" TextHeight="6.0" TextStyle="" FontFamily="Arial" DecimalFormat="#0.0#####" LocaleLang="en" LocaleCountry="" LocaleVariant="" LineColor="#000000" LineWidth="0.3" EdgeRadius="1.0"><LeafMargin Left="1.0" Top="0.3" Right="1.0" Bottom="0.3"></LeafMargin><Branch Length="0.003045975" LineColor="#000000" LineWidth="0.3" ConstantWidth="false" MinLength="4.0" MinSpaceAbove="0.0" MinSpaceBelow="0.0"></Branch></Node><Node Text="Oxyporus germanus3 CNUIC599" IsDecimal="false" UniqueName="em8y2owo40" TextColor="#000000" TextHeight="6.0" TextStyle="" FontFamily="Arial" DecimalFormat="#0.0#####" LocaleLang="en" LocaleCountry="" LocaleVariant="" LineColor="#000000" LineWidth="0.3" EdgeRadius="1.0"><LeafMargin Left="1.0" Top="0.3" Right="1.0" Bottom="0.3"></LeafMargin><Branch Length="0.002450024" LineColor="#000000" LineWidth="0.3" ConstantWidth="false" MinLength="4.0" MinSpaceAbove="0.0" MinSpaceBelow="0.0"></Branch></Node><Node Text="internalNode50" IsDecimal="false" UniqueName="smayib2o2r" TextColor="#000000" TextHeight="6.0" TextStyle="" FontFamily="Arial" DecimalFormat="#0.0#####" LocaleLang="en" LocaleCountry="" LocaleVariant="" LineColor="#000000" LineWidth="0.3" EdgeRadius="1.0"><LeafMargin Left="1.0" Top="0.3" Right="1.0" Bottom="0.3"></LeafMargin><Branch Length="0.003057528" LineColor="#000000" LineWidth="0.3" ConstantWidth="false" MinLength="4.0" MinSpaceAbove="0.0" MinSpaceBelow="0.0"><PieChartLabel TextColor="#000000" TextHeight="6.0" TextStyle="" FontFamily="Arial" DecimalFormat="#0.0#####" LocaleLang="en" LocaleCountry="" LocaleVariant="" LineColor="#000000" LineWidth="0.3" Width="6.0" Height="6.0" InternalLines="true" NullLines="false" ShowTitle="false" CaptionType="NONE" CaptionLinkType="STRAIGHT_LINES" Id="17" Above="true" LineNo="0" LinePos="0.0"><LabelMargin Left="1.0" Top="1.0" Right="1.0" Bottom="1.0"></LabelMargin><DataIds TextColor="#000000" TextStyle="" FontFamily="Arial" DecimalFormat="#0.0#####" LocaleLang="en" LocaleCountry="" LocaleVariant=""><DataId PieColor="#0000FF" PieCaption="">17.0</DataId><DataId PieColor="#FF0000" PieCaption="">17.1</DataId></DataIds></PieChartLabel><InvisibleData Id="17.1" Text="0.999949" IsDecimal="true"></InvisibleData><InvisibleData Id="17.0" Text="5.1E-5" IsDecimal="true"></InvisibleData></Branch><Node Text="Oxyporus germanus4 CNUIC600" IsDecimal="false" UniqueName="0goehaehjq" TextColor="#000000" TextHeight="6.0" TextStyle="" FontFamily="Arial" DecimalFormat="#0.0#####" LocaleLang="en" LocaleCountry="" LocaleVariant="" LineColor="#000000" LineWidth="0.3" EdgeRadius="1.0"><LeafMargin Left="1.0" Top="0.3" Right="1.0" Bottom="0.3"></LeafMargin><Branch Length="0.004016098" LineColor="#000000" LineWidth="0.3" ConstantWidth="false" MinLength="4.0" MinSpaceAbove="0.0" MinSpaceBelow="0.0"></Branch></Node><Node Text="Oxyporus germanus5 CNUIC640" IsDecimal="false" UniqueName="9jf0yifz90" TextColor="#000000" TextHeight="6.0" TextStyle="" FontFamily="Arial" DecimalFormat="#0.0#####" LocaleLang="en" LocaleCountry="" LocaleVariant="" LineColor="#000000" LineWidth="0.3" EdgeRadius="1.0"><LeafMargin Left="1.0" Top="0.3" Right="1.0" Bottom="0.3"></LeafMargin><Branch Length="0.001066973" LineColor="#000000" LineWidth="0.3" ConstantWidth="false" MinLength="4.0" MinSpaceAbove="0.0" MinSpaceBelow="0.0"></Branch></Node></Node></Node></Node><Node Text="Oxyporus germanus1 CNUIC515" IsDecimal="false" UniqueName="r4hmsjae4c" TextColor="#000000" TextHeight="6.0" TextStyle="" FontFamily="Arial" DecimalFormat="#0.0#####" LocaleLang="en" LocaleCountry="" LocaleVariant="" LineColor="#000000" LineWidth="0.3" EdgeRadius="1.0"><LeafMargin Left="1.0" Top="0.3" Right="1.0" Bottom="0.3"></LeafMargin><Branch Length="0.008300195" LineColor="#000000" LineWidth="0.3" ConstantWidth="false" MinLength="4.0" MinSpaceAbove="0.0" MinSpaceBelow="0.0"></Branch></Node></Node><Node Text="internalNode51" IsDecimal="false" UniqueName="rkzpf14908" TextColor="#000000" TextHeight="6.0" TextStyle="" FontFamily="Arial" DecimalFormat="#0.0#####" LocaleLang="en" LocaleCountry="" LocaleVariant="" LineColor="#000000" LineWidth="0.3" EdgeRadius="1.0"><LeafMargin Left="1.0" Top="0.3" Right="1.0" Bottom="0.3"></LeafMargin><Branch Length="0.05594781" LineColor="#000000" LineWidth="0.3" ConstantWidth="false" MinLength="4.0" MinSpaceAbove="0.0" MinSpaceBelow="0.0"><PieChartLabel TextColor="#000000" TextHeight="6.0" TextStyle="" FontFamily="Arial" DecimalFormat="#0.0#####" LocaleLang="en" LocaleCountry="" LocaleVariant="" LineColor="#000000" LineWidth="0.3" Width="6.0" Height="6.0" InternalLines="true" NullLines="false" ShowTitle="false" CaptionType="NONE" CaptionLinkType="STRAIGHT_LINES" Id="17" Above="true" LineNo="0" LinePos="0.0"><LabelMargin Left="1.0" Top="1.0" Right="1.0" Bottom="1.0"></LabelMargin><DataIds TextColor="#000000" TextStyle="" FontFamily="Arial" DecimalFormat="#0.0#####" LocaleLang="en" LocaleCountry="" LocaleVariant=""><DataId PieColor="#0000FF" PieCaption="">17.0</DataId><DataId PieColor="#FF0000" PieCaption="">17.1</DataId></DataIds></PieChartLabel><InvisibleData Id="17.1" Text="0.0" IsDecimal="true"></InvisibleData><InvisibleData Id="17.0" Text="1.0" IsDecimal="true"></InvisibleData></Branch><Node Text="internalNode52" IsDecimal="false" UniqueName="t4w52rk0ad" TextColor="#000000" TextHeight="6.0" TextStyle="" FontFamily="Arial" DecimalFormat="#0.0#####" LocaleLang="en" LocaleCountry="" LocaleVariant="" LineColor="#000000" LineWidth="0.3" EdgeRadius="1.0"><LeafMargin Left="1.0" Top="0.3" Right="1.0" Bottom="0.3"></LeafMargin><Branch Length="0.005363108" LineColor="#000000" LineWidth="0.3" ConstantWidth="false" MinLength="4.0" MinSpaceAbove="0.0" MinSpaceBelow="0.0"><PieChartLabel TextColor="#000000" TextHeight="6.0" TextStyle="" FontFamily="Arial" DecimalFormat="#0.0#####" LocaleLang="en" LocaleCountry="" LocaleVariant="" LineColor="#000000" LineWidth="0.3" Width="6.0" Height="6.0" InternalLines="true" NullLines="false" ShowTitle="false" CaptionType="NONE" CaptionLinkType="STRAIGHT_LINES" Id="17" Above="true" LineNo="0" LinePos="0.0"><LabelMargin Left="1.0" Top="1.0" Right="1.0" Bottom="1.0"></LabelMargin><DataIds TextColor="#000000" TextStyle="" FontFamily="Arial" DecimalFormat="#0.0#####" LocaleLang="en" LocaleCountry="" LocaleVariant=""><DataId PieColor="#0000FF" PieCaption="">17.0</DataId><DataId PieColor="#FF0000" PieCaption="">17.1</DataId></DataIds></PieChartLabel><InvisibleData Id="17.1" Text="0.0" IsDecimal="true"></InvisibleData><InvisibleData Id="17.0" Text="1.0" IsDecimal="true"></InvisibleData></Branch><Node Text="Oxyporus rufus Bor19 35" IsDecimal="false" UniqueName="wi6hy78j0h" TextColor="#000000" TextHeight="6.0" TextStyle="" FontFamily="Arial" DecimalFormat="#0.0#####" LocaleLang="en" LocaleCountry="" LocaleVariant="" LineColor="#000000" LineWidth="0.3" EdgeRadius="1.0"><LeafMargin Left="1.0" Top="0.3" Right="1.0" Bottom="0.3"></LeafMargin><Branch Length="0.002493184" LineColor="#000000" LineWidth="0.3" ConstantWidth="false" MinLength="4.0" MinSpaceAbove="0.0" MinSpaceBelow="0.0"></Branch></Node><Node Text="Oxyporus rufus GornTaezhFE18 09" IsDecimal="false" UniqueName="3dkrj0dv31" TextColor="#000000" TextHeight="6.0" TextStyle="" FontFamily="Arial" DecimalFormat="#0.0#####" LocaleLang="en" LocaleCountry="" LocaleVariant="" LineColor="#000000" LineWidth="0.3" EdgeRadius="1.0"><LeafMargin Left="1.0" Top="0.3" Right="1.0" Bottom="0.3"></LeafMargin><Branch Length="0.00102175" LineColor="#000000" LineWidth="0.3" ConstantWidth="false" MinLength="4.0" MinSpaceAbove="0.0" MinSpaceBelow="0.0"></Branch></Node><Node Text="Oxyporus rufus NCBI Finl KJ965221 1" IsDecimal="false" UniqueName="x3tjyjcerp" TextColor="#000000" TextHeight="6.0" TextStyle="" FontFamily="Arial" DecimalFormat="#0.0#####" LocaleLang="en" LocaleCountry="" LocaleVariant="" LineColor="#000000" LineWidth="0.3" EdgeRadius="1.0"><LeafMargin Left="1.0" Top="0.3" Right="1.0" Bottom="0.3"></LeafMargin><Branch Length="0.001103536" LineColor="#000000" LineWidth="0.3" ConstantWidth="false" MinLength="4.0" MinSpaceAbove="0.0" MinSpaceBelow="0.0"></Branch></Node><Node Text="Oxyporus rufus ZMUO NCBI Finl KJ966577 1" IsDecimal="false" UniqueName="frqvdv20we" TextColor="#000000" TextHeight="6.0" TextStyle="" FontFamily="Arial" DecimalFormat="#0.0#####" LocaleLang="en" LocaleCountry="" LocaleVariant="" LineColor="#000000" LineWidth="0.3" EdgeRadius="1.0"><LeafMargin Left="1.0" Top="0.3" Right="1.0" Bottom="0.3"></LeafMargin><Branch Length="0.001109042" LineColor="#000000" LineWidth="0.3" ConstantWidth="false" MinLength="4.0" MinSpaceAbove="0.0" MinSpaceBelow="0.0"></Branch></Node><Node Text="Oxyporus rufus1 KJ964395" IsDecimal="false" UniqueName="sso3th6u0r" TextColor="#000000" TextHeight="6.0" TextStyle="" FontFamily="Arial" DecimalFormat="#0.0#####" LocaleLang="en" LocaleCountry="" LocaleVariant="" LineColor="#000000" LineWidth="0.3" EdgeRadius="1.0"><LeafMargin Left="1.0" Top="0.3" Right="1.0" Bottom="0.3"></LeafMargin><Branch Length="0.002433899" LineColor="#000000" LineWidth="0.3" ConstantWidth="false" MinLength="4.0" MinSpaceAbove="0.0" MinSpaceBelow="0.0"></Branch></Node><Node Text="Oxyporus rufus2 KJ965221" IsDecimal="false" UniqueName="62btvkpfxg" TextColor="#000000" TextHeight="6.0" TextStyle="" FontFamily="Arial" DecimalFormat="#0.0#####" LocaleLang="en" LocaleCountry="" LocaleVariant="" LineColor="#000000" LineWidth="0.3" EdgeRadius="1.0"><LeafMargin Left="1.0" Top="0.3" Right="1.0" Bottom="0.3"></LeafMargin><Branch Length="0.001034642" LineColor="#000000" LineWidth="0.3" ConstantWidth="false" MinLength="4.0" MinSpaceAbove="0.0" MinSpaceBelow="0.0"></Branch></Node><Node Text="Oxyporus rufus3 KJ966577" IsDecimal="false" UniqueName="p72c3066e0" TextColor="#000000" TextHeight="6.0" TextStyle="" FontFamily="Arial" DecimalFormat="#0.0#####" LocaleLang="en" LocaleCountry="" LocaleVariant="" LineColor="#000000" LineWidth="0.3" EdgeRadius="1.0"><LeafMargin Left="1.0" Top="0.3" Right="1.0" Bottom="0.3"></LeafMargin><Branch Length="0.001034602" LineColor="#000000" LineWidth="0.3" ConstantWidth="false" MinLength="4.0" MinSpaceAbove="0.0" MinSpaceBelow="0.0"></Branch></Node></Node><Node Text="Oxyporus rufus NCBI Germ KU906276 1" IsDecimal="false" UniqueName="90jprwc2ps" TextColor="#000000" TextHeight="6.0" TextStyle="" FontFamily="Arial" DecimalFormat="#0.0#####" LocaleLang="en" LocaleCountry="" LocaleVariant="" LineColor="#000000" LineWidth="0.3" EdgeRadius="1.0"><LeafMargin Left="1.0" Top="0.3" Right="1.0" Bottom="0.3"></LeafMargin><Branch Length="0.001116525" LineColor="#000000" LineWidth="0.3" ConstantWidth="false" MinLength="4.0" MinSpaceAbove="0.0" MinSpaceBelow="0.0"></Branch></Node><Node Text="Oxyporus rufus NCBI Germ KU915441 1" IsDecimal="false" UniqueName="bdamncry9u" TextColor="#000000" TextHeight="6.0" TextStyle="" FontFamily="Arial" DecimalFormat="#0.0#####" LocaleLang="en" LocaleCountry="" LocaleVariant="" LineColor="#000000" LineWidth="0.3" EdgeRadius="1.0"><LeafMargin Left="1.0" Top="0.3" Right="1.0" Bottom="0.3"></LeafMargin><Branch Length="0.001143182" LineColor="#000000" LineWidth="0.3" ConstantWidth="false" MinLength="4.0" MinSpaceAbove="0.0" MinSpaceBelow="0.0"></Branch></Node><Node Text="Oxyporus rufus Petergof18 34" IsDecimal="false" UniqueName="485oipqr2c" TextColor="#000000" TextHeight="6.0" TextStyle="" FontFamily="Arial" DecimalFormat="#0.0#####" LocaleLang="en" LocaleCountry="" LocaleVariant="" LineColor="#000000" LineWidth="0.3" EdgeRadius="1.0"><LeafMargin Left="1.0" Top="0.3" Right="1.0" Bottom="0.3"></LeafMargin><Branch Length="0.003370751" LineColor="#000000" LineWidth="0.3" ConstantWidth="false" MinLength="4.0" MinSpaceAbove="0.0" MinSpaceBelow="0.0"></Branch></Node></Node></Node><Node Text="internalNode16" IsDecimal="false" UniqueName="wi2np008u4" TextColor="#000000" TextHeight="6.0" TextStyle="" FontFamily="Arial" DecimalFormat="#0.0#####" LocaleLang="en" LocaleCountry="" LocaleVariant="" LineColor="#000000" LineWidth="0.3" EdgeRadius="1.0"><LeafMargin Left="1.0" Top="0.3" Right="1.0" Bottom="0.3"></LeafMargin><Branch Length="0.02634827" LineColor="#000000" LineWidth="0.3" ConstantWidth="false" MinLength="4.0" MinSpaceAbove="0.0" MinSpaceBelow="0.0"><PieChartLabel TextColor="#000000" TextHeight="6.0" TextStyle="" FontFamily="Arial" DecimalFormat="#0.0#####" LocaleLang="en" LocaleCountry="" LocaleVariant="" LineColor="#000000" LineWidth="0.3" Width="6.0" Height="6.0" InternalLines="true" NullLines="false" ShowTitle="false" CaptionType="NONE" CaptionLinkType="STRAIGHT_LINES" Id="17" Above="true" LineNo="0" LinePos="0.0"><LabelMargin Left="1.0" Top="1.0" Right="1.0" Bottom="1.0"></LabelMargin><DataIds TextColor="#000000" TextStyle="" FontFamily="Arial" DecimalFormat="#0.0#####" LocaleLang="en" LocaleCountry="" LocaleVariant=""><DataId PieColor="#0000FF" PieCaption="">17.0</DataId><DataId PieColor="#FF0000" PieCaption="">17.1</DataId></DataIds></PieChartLabel><InvisibleData Id="17.1" Text="0.991758" IsDecimal="true"></InvisibleData><InvisibleData Id="17.0" Text="0.008242" IsDecimal="true"></InvisibleData></Branch><Node Text="internalNode17" IsDecimal="false" UniqueName="074cijtevh" TextColor="#000000" TextHeight="6.0" TextStyle="" FontFamily="Arial" DecimalFormat="#0.0#####" LocaleLang="en" LocaleCountry="" LocaleVariant="" LineColor="#000000" LineWidth="0.3" EdgeRadius="1.0"><LeafMargin Left="1.0" Top="0.3" Right="1.0" Bottom="0.3"></LeafMargin><Branch Length="0.03898149" LineColor="#000000" LineWidth="0.3" ConstantWidth="false" MinLength="4.0" MinSpaceAbove="0.0" MinSpaceBelow="0.0"><PieChartLabel TextColor="#000000" TextHeight="6.0" TextStyle="" FontFamily="Arial" DecimalFormat="#0.0#####" LocaleLang="en" LocaleCountry="" LocaleVariant="" LineColor="#000000" LineWidth="0.3" Width="6.0" Height="6.0" InternalLines="true" NullLines="false" ShowTitle="false" CaptionType="NONE" CaptionLinkType="STRAIGHT_LINES" Id="17" Above="true" LineNo="0" LinePos="0.0"><LabelMargin Left="1.0" Top="1.0" Right="1.0" Bottom="1.0"></LabelMargin><DataIds TextColor="#000000" TextStyle="" FontFamily="Arial" DecimalFormat="#0.0#####" LocaleLang="en" LocaleCountry="" LocaleVariant=""><DataId PieColor="#0000FF" PieCaption="">17.0</DataId><DataId PieColor="#FF0000" PieCaption="">17.1</DataId></DataIds></PieChartLabel><InvisibleData Id="17.1" Text="0.999988" IsDecimal="true"></InvisibleData><InvisibleData Id="17.0" Text="1.2E-5" IsDecimal="true"></InvisibleData></Branch><Node Text="internalNode18" IsDecimal="false" UniqueName="d7dcga7gxu" TextColor="#000000" TextHeight="6.0" TextStyle="" FontFamily="Arial" DecimalFormat="#0.0#####" LocaleLang="en" LocaleCountry="" LocaleVariant="" LineColor="#000000" LineWidth="0.3" EdgeRadius="1.0"><LeafMargin Left="1.0" Top="0.3" Right="1.0" Bottom="0.3"></LeafMargin><Branch Length="0.007755554" LineColor="#000000" LineWidth="0.3" ConstantWidth="false" MinLength="4.0" MinSpaceAbove="0.0" MinSpaceBelow="0.0"><PieChartLabel TextColor="#000000" TextHeight="6.0" TextStyle="" FontFamily="Arial" DecimalFormat="#0.0#####" LocaleLang="en" LocaleCountry="" LocaleVariant="" LineColor="#000000" LineWidth="0.3" Width="6.0" Height="6.0" InternalLines="true" NullLines="false" ShowTitle="false" CaptionType="NONE" CaptionLinkType="STRAIGHT_LINES" Id="17" Above="true" LineNo="0" LinePos="0.0"><LabelMargin Left="1.0" Top="1.0" Right="1.0" Bottom="1.0"></LabelMargin><DataIds TextColor="#000000" TextStyle="" FontFamily="Arial" DecimalFormat="#0.0#####" LocaleLang="en" LocaleCountry="" LocaleVariant=""><DataId PieColor="#0000FF" PieCaption="">17.0</DataId><DataId PieColor="#FF0000" PieCaption="">17.1</DataId></DataIds></PieChartLabel><InvisibleData Id="17.1" Text="1.0" IsDecimal="true"></InvisibleData><InvisibleData Id="17.0" Text="0.0" IsDecimal="true"></InvisibleData></Branch><Node Text="internalNode19" IsDecimal="false" UniqueName="4awggkswnp" TextColor="#000000" TextHeight="6.0" TextStyle="" FontFamily="Arial" DecimalFormat="#0.0#####" LocaleLang="en" LocaleCountry="" LocaleVariant="" LineColor="#000000" LineWidth="0.3" EdgeRadius="1.0"><LeafMargin Left="1.0" Top="0.3" Right="1.0" Bottom="0.3"></LeafMargin><Branch Length="0.002429392" LineColor="#000000" LineWidth="0.3" ConstantWidth="false" MinLength="4.0" MinSpaceAbove="0.0" MinSpaceBelow="0.0"><PieChartLabel TextColor="#000000" TextHeight="6.0" TextStyle="" FontFamily="Arial" DecimalFormat="#0.0#####" LocaleLang="en" LocaleCountry="" LocaleVariant="" LineColor="#000000" LineWidth="0.3" Width="6.0" Height="6.0" InternalLines="true" NullLines="false" ShowTitle="false" CaptionType="NONE" CaptionLinkType="STRAIGHT_LINES" Id="17" Above="true" LineNo="0" LinePos="0.0"><LabelMargin Left="1.0" Top="1.0" Right="1.0" Bottom="1.0"></LabelMargin><DataIds TextColor="#000000" TextStyle="" FontFamily="Arial" DecimalFormat="#0.0#####" LocaleLang="en" LocaleCountry="" LocaleVariant=""><DataId PieColor="#0000FF" PieCaption="">17.0</DataId><DataId PieColor="#FF0000" PieCaption="">17.1</DataId></DataIds></PieChartLabel><InvisibleData Id="17.1" Text="1.0" IsDecimal="true"></InvisibleData><InvisibleData Id="17.0" Text="0.0" IsDecimal="true"></InvisibleData></Branch><Node Text="Oxyporus aequicollis PogranFE19 33" IsDecimal="false" UniqueName="vymk7y4ta0" TextColor="#000000" TextHeight="6.0" TextStyle="" FontFamily="Arial" DecimalFormat="#0.0#####" LocaleLang="en" LocaleCountry="" LocaleVariant="" LineColor="#000000" LineWidth="0.3" EdgeRadius="1.0"><LeafMargin Left="1.0" Top="0.3" Right="1.0" Bottom="0.3"></LeafMargin><Branch Length="0.001060335" LineColor="#000000" LineWidth="0.3" ConstantWidth="false" MinLength="4.0" MinSpaceAbove="0.0" MinSpaceBelow="0.0"></Branch></Node><Node Text="Oxyporus aequicollis small PogranFE19 43" IsDecimal="false" UniqueName="ygxlvng0ek" TextColor="#000000" TextHeight="6.0" TextStyle="" FontFamily="Arial" DecimalFormat="#0.0#####" LocaleLang="en" LocaleCountry="" LocaleVariant="" LineColor="#000000" LineWidth="0.3" EdgeRadius="1.0"><LeafMargin Left="1.0" Top="0.3" Right="1.0" Bottom="0.3"></LeafMargin><Branch Length="0.001055718" LineColor="#000000" LineWidth="0.3" ConstantWidth="false" MinLength="4.0" MinSpaceAbove="0.0" MinSpaceBelow="0.0"></Branch></Node><Node Text="Oxyporus germanus PogranFE19 40" IsDecimal="false" UniqueName="17s88k24tr" TextColor="#000000" TextHeight="6.0" TextStyle="" FontFamily="Arial" DecimalFormat="#0.0#####" LocaleLang="en" LocaleCountry="" LocaleVariant="" LineColor="#000000" LineWidth="0.3" EdgeRadius="1.0"><LeafMargin Left="1.0" Top="0.3" Right="1.0" Bottom="0.3"></LeafMargin><Branch Length="0.004064341" LineColor="#000000" LineWidth="0.3" ConstantWidth="false" MinLength="4.0" MinSpaceAbove="0.0" MinSpaceBelow="0.0"></Branch></Node></Node><Node Text="Oxyporus basicornis Buryatia19 13" IsDecimal="false" UniqueName="sthqcrfxoo" TextColor="#000000" TextHeight="6.0" TextStyle="" FontFamily="Arial" DecimalFormat="#0.0#####" LocaleLang="en" LocaleCountry="" LocaleVariant="" LineColor="#000000" LineWidth="0.3" EdgeRadius="1.0"><LeafMargin Left="1.0" Top="0.3" Right="1.0" Bottom="0.3"></LeafMargin><Branch Length="0.001015554" LineColor="#000000" LineWidth="0.3" ConstantWidth="false" MinLength="4.0" MinSpaceAbove="0.0" MinSpaceBelow="0.0"></Branch></Node><Node Text="Oxyporus basicornis GornTaezhFE18 19" IsDecimal="false" UniqueName="b0muvccdnf" TextColor="#000000" TextHeight="6.0" TextStyle="" FontFamily="Arial" DecimalFormat="#0.0#####" LocaleLang="en" LocaleCountry="" LocaleVariant="" LineColor="#000000" LineWidth="0.3" EdgeRadius="1.0"><LeafMargin Left="1.0" Top="0.3" Right="1.0" Bottom="0.3"></LeafMargin><Branch Length="0.001021344" LineColor="#000000" LineWidth="0.3" ConstantWidth="false" MinLength="4.0" MinSpaceAbove="0.0" MinSpaceBelow="0.0"></Branch></Node><Node Text="Oxyporus basicornis GornTaezhFE18 38" IsDecimal="false" UniqueName="t09pvafq7i" TextColor="#000000" TextHeight="6.0" TextStyle="" FontFamily="Arial" DecimalFormat="#0.0#####" LocaleLang="en" LocaleCountry="" LocaleVariant="" LineColor="#000000" LineWidth="0.3" EdgeRadius="1.0"><LeafMargin Left="1.0" Top="0.3" Right="1.0" Bottom="0.3"></LeafMargin><Branch Length="0.001071998" LineColor="#000000" LineWidth="0.3" ConstantWidth="false" MinLength="4.0" MinSpaceAbove="0.0" MinSpaceBelow="0.0"></Branch></Node><Node Text="Oxyporus basicornis PogranFE19 42" IsDecimal="false" UniqueName="cz9lsp1wb5" TextColor="#000000" TextHeight="6.0" TextStyle="" FontFamily="Arial" DecimalFormat="#0.0#####" LocaleLang="en" LocaleCountry="" LocaleVariant="" LineColor="#000000" LineWidth="0.3" EdgeRadius="1.0"><LeafMargin Left="1.0" Top="0.3" Right="1.0" Bottom="0.3"></LeafMargin><Branch Length="0.001042375" LineColor="#000000" LineWidth="0.3" ConstantWidth="false" MinLength="4.0" MinSpaceAbove="0.0" MinSpaceBelow="0.0"></Branch></Node><Node Text="Oxyporus basicornis PogranFE19 50" IsDecimal="false" UniqueName="r7f719f24p" TextColor="#000000" TextHeight="6.0" TextStyle="" FontFamily="Arial" DecimalFormat="#0.0#####" LocaleLang="en" LocaleCountry="" LocaleVariant="" LineColor="#000000" LineWidth="0.3" EdgeRadius="1.0"><LeafMargin Left="1.0" Top="0.3" Right="1.0" Bottom="0.3"></LeafMargin><Branch Length="0.001104173" LineColor="#000000" LineWidth="0.3" ConstantWidth="false" MinLength="4.0" MinSpaceAbove="0.0" MinSpaceBelow="0.0"></Branch></Node></Node><Node Text="internalNode20" IsDecimal="false" UniqueName="9v5lpbujai" TextColor="#000000" TextHeight="6.0" TextStyle="" FontFamily="Arial" DecimalFormat="#0.0#####" LocaleLang="en" LocaleCountry="" LocaleVariant="" LineColor="#000000" LineWidth="0.3" EdgeRadius="1.0"><LeafMargin Left="1.0" Top="0.3" Right="1.0" Bottom="0.3"></LeafMargin><Branch Length="0.008685141" LineColor="#000000" LineWidth="0.3" ConstantWidth="false" MinLength="4.0" MinSpaceAbove="0.0" MinSpaceBelow="0.0"><PieChartLabel TextColor="#000000" TextHeight="6.0" TextStyle="" FontFamily="Arial" DecimalFormat="#0.0#####" LocaleLang="en" LocaleCountry="" LocaleVariant="" LineColor="#000000" LineWidth="0.3" Width="6.0" Height="6.0" InternalLines="true" NullLines="false" ShowTitle="false" CaptionType="NONE" CaptionLinkType="STRAIGHT_LINES" Id="17" Above="true" LineNo="0" LinePos="0.0"><LabelMargin Left="1.0" Top="1.0" Right="1.0" Bottom="1.0"></LabelMargin><DataIds TextColor="#000000" TextStyle="" FontFamily="Arial" DecimalFormat="#0.0#####" LocaleLang="en" LocaleCountry="" LocaleVariant=""><DataId PieColor="#0000FF" PieCaption="">17.0</DataId><DataId PieColor="#FF0000" PieCaption="">17.1</DataId></DataIds></PieChartLabel><InvisibleData Id="17.1" Text="0.999861" IsDecimal="true"></InvisibleData><InvisibleData Id="17.0" Text="1.39E-4" IsDecimal="true"></InvisibleData></Branch><Node Text="internalNode21" IsDecimal="false" UniqueName="0qlcv8s3m8" TextColor="#000000" TextHeight="6.0" TextStyle="" FontFamily="Arial" DecimalFormat="#0.0#####" LocaleLang="en" LocaleCountry="" LocaleVariant="" LineColor="#000000" LineWidth="0.3" EdgeRadius="1.0"><LeafMargin Left="1.0" Top="0.3" Right="1.0" Bottom="0.3"></LeafMargin><Branch Length="0.003971854" LineColor="#000000" LineWidth="0.3" ConstantWidth="false" MinLength="4.0" MinSpaceAbove="0.0" MinSpaceBelow="0.0"><PieChartLabel TextColor="#000000" TextHeight="6.0" TextStyle="" FontFamily="Arial" DecimalFormat="#0.0#####" LocaleLang="en" LocaleCountry="" LocaleVariant="" LineColor="#000000" LineWidth="0.3" Width="6.0" Height="6.0" InternalLines="true" NullLines="false" ShowTitle="false" CaptionType="NONE" CaptionLinkType="STRAIGHT_LINES" Id="17" Above="true" LineNo="0" LinePos="0.0"><LabelMargin Left="1.0" Top="1.0" Right="1.0" Bottom="1.0"></LabelMargin><DataIds TextColor="#000000" TextStyle="" FontFamily="Arial" DecimalFormat="#0.0#####" LocaleLang="en" LocaleCountry="" LocaleVariant=""><DataId PieColor="#0000FF" PieCaption="">17.0</DataId><DataId PieColor="#FF0000" PieCaption="">17.1</DataId></DataIds></PieChartLabel><InvisibleData Id="17.1" Text="1.0" IsDecimal="true"></InvisibleData><InvisibleData Id="17.0" Text="0.0" IsDecimal="true"></InvisibleData></Branch><Node Text="internalNode22" IsDecimal="false" UniqueName="51t0q5tjbo" TextColor="#000000" TextHeight="6.0" TextStyle="" FontFamily="Arial" DecimalFormat="#0.0#####" LocaleLang="en" LocaleCountry="" LocaleVariant="" LineColor="#000000" LineWidth="0.3" EdgeRadius="1.0"><LeafMargin Left="1.0" Top="0.3" Right="1.0" Bottom="0.3"></LeafMargin><Branch Length="0.003874716" LineColor="#000000" LineWidth="0.3" ConstantWidth="false" MinLength="4.0" MinSpaceAbove="0.0" MinSpaceBelow="0.0"><PieChartLabel TextColor="#000000" TextHeight="6.0" TextStyle="" FontFamily="Arial" DecimalFormat="#0.0#####" LocaleLang="en" LocaleCountry="" LocaleVariant="" LineColor="#000000" LineWidth="0.3" Width="6.0" Height="6.0" InternalLines="true" NullLines="false" ShowTitle="false" CaptionType="NONE" CaptionLinkType="STRAIGHT_LINES" Id="17" Above="true" LineNo="0" LinePos="0.0"><LabelMargin Left="1.0" Top="1.0" Right="1.0" Bottom="1.0"></LabelMargin><DataIds TextColor="#000000" TextStyle="" FontFamily="Arial" DecimalFormat="#0.0#####" LocaleLang="en" LocaleCountry="" LocaleVariant=""><DataId PieColor="#0000FF" PieCaption="">17.0</DataId><DataId PieColor="#FF0000" PieCaption="">17.1</DataId></DataIds></PieChartLabel><InvisibleData Id="17.1" Text="0.999944" IsDecimal="true"></InvisibleData><InvisibleData Id="17.0" Text="5.6E-5" IsDecimal="true"></InvisibleData></Branch><Node Text="Oxyporus basicornis PosietFE19 39" IsDecimal="false" UniqueName="tgvpevbxpw" TextColor="#000000" TextHeight="6.0" TextStyle="" FontFamily="Arial" DecimalFormat="#0.0#####" LocaleLang="en" LocaleCountry="" LocaleVariant="" LineColor="#000000" LineWidth="0.3" EdgeRadius="1.0"><LeafMargin Left="1.0" Top="0.3" Right="1.0" Bottom="0.3"></LeafMargin><Branch Length="0.001308245" LineColor="#000000" LineWidth="0.3" ConstantWidth="false" MinLength="4.0" MinSpaceAbove="0.0" MinSpaceBelow="0.0"></Branch></Node><Node Text="Oxyporus germanus PosietFE19 11" IsDecimal="false" UniqueName="ovxv6axki6" TextColor="#000000" TextHeight="6.0" TextStyle="" FontFamily="Arial" DecimalFormat="#0.0#####" LocaleLang="en" LocaleCountry="" LocaleVariant="" LineColor="#000000" LineWidth="0.3" EdgeRadius="1.0"><LeafMargin Left="1.0" Top="0.3" Right="1.0" Bottom="0.3"></LeafMargin><Branch Length="0.003542844" LineColor="#000000" LineWidth="0.3" ConstantWidth="false" MinLength="4.0" MinSpaceAbove="0.0" MinSpaceBelow="0.0"></Branch></Node></Node><Node Text="internalNode23" IsDecimal="false" UniqueName="jtrvhqbwo8" TextColor="#000000" TextHeight="6.0" TextStyle="" FontFamily="Arial" DecimalFormat="#0.0#####" LocaleLang="en" LocaleCountry="" LocaleVariant="" LineColor="#000000" LineWidth="0.3" EdgeRadius="1.0"><LeafMargin Left="1.0" Top="0.3" Right="1.0" Bottom="0.3"></LeafMargin><Branch Length="0.005949093" LineColor="#000000" LineWidth="0.3" ConstantWidth="false" MinLength="4.0" MinSpaceAbove="0.0" MinSpaceBelow="0.0"><PieChartLabel TextColor="#000000" TextHeight="6.0" TextStyle="" FontFamily="Arial" DecimalFormat="#0.0#####" LocaleLang="en" LocaleCountry="" LocaleVariant="" LineColor="#000000" LineWidth="0.3" Width="6.0" Height="6.0" InternalLines="true" NullLines="false" ShowTitle="false" CaptionType="NONE" CaptionLinkType="STRAIGHT_LINES" Id="17" Above="true" LineNo="0" LinePos="0.0"><LabelMargin Left="1.0" Top="1.0" Right="1.0" Bottom="1.0"></LabelMargin><DataIds TextColor="#000000" TextStyle="" FontFamily="Arial" DecimalFormat="#0.0#####" LocaleLang="en" LocaleCountry="" LocaleVariant=""><DataId PieColor="#0000FF" PieCaption="">17.0</DataId><DataId PieColor="#FF0000" PieCaption="">17.1</DataId></DataIds></PieChartLabel><InvisibleData Id="17.1" Text="0.999963" IsDecimal="true"></InvisibleData><InvisibleData Id="17.0" Text="3.7E-5" IsDecimal="true"></InvisibleData></Branch><Node Text="internalNode24" IsDecimal="false" UniqueName="fwtus1dmdb" TextColor="#000000" TextHeight="6.0" TextStyle="" FontFamily="Arial" DecimalFormat="#0.0#####" LocaleLang="en" LocaleCountry="" LocaleVariant="" LineColor="#000000" LineWidth="0.3" EdgeRadius="1.0"><LeafMargin Left="1.0" Top="0.3" Right="1.0" Bottom="0.3"></LeafMargin><Branch Length="0.002467292" LineColor="#000000" LineWidth="0.3" ConstantWidth="false" MinLength="4.0" MinSpaceAbove="0.0" MinSpaceBelow="0.0"><PieChartLabel TextColor="#000000" TextHeight="6.0" TextStyle="" FontFamily="Arial" DecimalFormat="#0.0#####" LocaleLang="en" LocaleCountry="" LocaleVariant="" LineColor="#000000" LineWidth="0.3" Width="6.0" Height="6.0" InternalLines="true" NullLines="false" ShowTitle="false" CaptionType="NONE" CaptionLinkType="STRAIGHT_LINES" Id="17" Above="true" LineNo="0" LinePos="0.0"><LabelMargin Left="1.0" Top="1.0" Right="1.0" Bottom="1.0"></LabelMargin><DataIds TextColor="#000000" TextStyle="" FontFamily="Arial" DecimalFormat="#0.0#####" LocaleLang="en" LocaleCountry="" LocaleVariant=""><DataId PieColor="#0000FF" PieCaption="">17.0</DataId><DataId PieColor="#FF0000" PieCaption="">17.1</DataId></DataIds></PieChartLabel><InvisibleData Id="17.1" Text="0.999918" IsDecimal="true"></InvisibleData><InvisibleData Id="17.0" Text="8.2E-5" IsDecimal="true"></InvisibleData></Branch><Node Text="Oxyporus parvus1 CNUIC588" IsDecimal="false" UniqueName="go60gstnt9" TextColor="#000000" TextHeight="6.0" TextStyle="" FontFamily="Arial" DecimalFormat="#0.0#####" LocaleLang="en" LocaleCountry="" LocaleVariant="" LineColor="#000000" LineWidth="0.3" EdgeRadius="1.0"><LeafMargin Left="1.0" Top="0.3" Right="1.0" Bottom="0.3"></LeafMargin><Branch Length="0.00248024" LineColor="#000000" LineWidth="0.3" ConstantWidth="false" MinLength="4.0" MinSpaceAbove="0.0" MinSpaceBelow="0.0"></Branch></Node><Node Text="Oxyporus parvus2 CNUIC601" IsDecimal="false" UniqueName="ht01goabk1" TextColor="#000000" TextHeight="6.0" TextStyle="" FontFamily="Arial" DecimalFormat="#0.0#####" LocaleLang="en" LocaleCountry="" LocaleVariant="" LineColor="#000000" LineWidth="0.3" EdgeRadius="1.0"><LeafMargin Left="1.0" Top="0.3" Right="1.0" Bottom="0.3"></LeafMargin><Branch Length="0.002749748" LineColor="#000000" LineWidth="0.3" ConstantWidth="false" MinLength="4.0" MinSpaceAbove="0.0" MinSpaceBelow="0.0"></Branch></Node></Node><Node Text="Oxyporus parvus5 CNUIC604" IsDecimal="false" UniqueName="uawxwkmx42" TextColor="#000000" TextHeight="6.0" TextStyle="" FontFamily="Arial" DecimalFormat="#0.0#####" LocaleLang="en" LocaleCountry="" LocaleVariant="" LineColor="#000000" LineWidth="0.3" EdgeRadius="1.0"><LeafMargin Left="1.0" Top="0.3" Right="1.0" Bottom="0.3"></LeafMargin><Branch Length="0.001248784" LineColor="#000000" LineWidth="0.3" ConstantWidth="false" MinLength="4.0" MinSpaceAbove="0.0" MinSpaceBelow="0.0"></Branch></Node></Node><Node Text="Oxyporus parvus4 CNUIC603" IsDecimal="false" UniqueName="oqs8dgp1ll" TextColor="#000000" TextHeight="6.0" TextStyle="" FontFamily="Arial" DecimalFormat="#0.0#####" LocaleLang="en" LocaleCountry="" LocaleVariant="" LineColor="#000000" LineWidth="0.3" EdgeRadius="1.0"><LeafMargin Left="1.0" Top="0.3" Right="1.0" Bottom="0.3"></LeafMargin><Branch Length="0.001062062" LineColor="#000000" LineWidth="0.3" ConstantWidth="false" MinLength="4.0" MinSpaceAbove="0.0" MinSpaceBelow="0.0"></Branch></Node><Node Text="Oxyporus parvus7 CNUIC606" IsDecimal="false" UniqueName="mn050r7ybv" TextColor="#000000" TextHeight="6.0" TextStyle="" FontFamily="Arial" DecimalFormat="#0.0#####" LocaleLang="en" LocaleCountry="" LocaleVariant="" LineColor="#000000" LineWidth="0.3" EdgeRadius="1.0"><LeafMargin Left="1.0" Top="0.3" Right="1.0" Bottom="0.3"></LeafMargin><Branch Length="0.0060031" LineColor="#000000" LineWidth="0.3" ConstantWidth="false" MinLength="4.0" MinSpaceAbove="0.0" MinSpaceBelow="0.0"></Branch></Node><Node Text="Oxyporus parvus8 CNUIC632" IsDecimal="false" UniqueName="xyv5bk05yg" TextColor="#000000" TextHeight="6.0" TextStyle="" FontFamily="Arial" DecimalFormat="#0.0#####" LocaleLang="en" LocaleCountry="" LocaleVariant="" LineColor="#000000" LineWidth="0.3" EdgeRadius="1.0"><LeafMargin Left="1.0" Top="0.3" Right="1.0" Bottom="0.3"></LeafMargin><Branch Length="0.002590715" LineColor="#000000" LineWidth="0.3" ConstantWidth="false" MinLength="4.0" MinSpaceAbove="0.0" MinSpaceBelow="0.0"></Branch></Node></Node><Node Text="Oxyporus parvus6 CNUIC605" IsDecimal="false" UniqueName="zhw90l2iuz" TextColor="#000000" TextHeight="6.0" TextStyle="" FontFamily="Arial" DecimalFormat="#0.0#####" LocaleLang="en" LocaleCountry="" LocaleVariant="" LineColor="#000000" LineWidth="0.3" EdgeRadius="1.0"><LeafMargin Left="1.0" Top="0.3" Right="1.0" Bottom="0.3"></LeafMargin><Branch Length="0.002910179" LineColor="#000000" LineWidth="0.3" ConstantWidth="false" MinLength="4.0" MinSpaceAbove="0.0" MinSpaceBelow="0.0"></Branch></Node></Node><Node Text="internalNode25" IsDecimal="false" UniqueName="an9hhgtax8" TextColor="#000000" TextHeight="6.0" TextStyle="" FontFamily="Arial" DecimalFormat="#0.0#####" LocaleLang="en" LocaleCountry="" LocaleVariant="" LineColor="#000000" LineWidth="0.3" EdgeRadius="1.0"><LeafMargin Left="1.0" Top="0.3" Right="1.0" Bottom="0.3"></LeafMargin><Branch Length="0.004202501" LineColor="#000000" LineWidth="0.3" ConstantWidth="false" MinLength="4.0" MinSpaceAbove="0.0" MinSpaceBelow="0.0"><PieChartLabel TextColor="#000000" TextHeight="6.0" TextStyle="" FontFamily="Arial" DecimalFormat="#0.0#####" LocaleLang="en" LocaleCountry="" LocaleVariant="" LineColor="#000000" LineWidth="0.3" Width="6.0" Height="6.0" InternalLines="true" NullLines="false" ShowTitle="false" CaptionType="NONE" CaptionLinkType="STRAIGHT_LINES" Id="17" Above="true" LineNo="0" LinePos="0.0"><LabelMargin Left="1.0" Top="1.0" Right="1.0" Bottom="1.0"></LabelMargin><DataIds TextColor="#000000" TextStyle="" FontFamily="Arial" DecimalFormat="#0.0#####" LocaleLang="en" LocaleCountry="" LocaleVariant=""><DataId PieColor="#0000FF" PieCaption="">17.0</DataId><DataId PieColor="#FF0000" PieCaption="">17.1</DataId></DataIds></PieChartLabel><InvisibleData Id="17.1" Text="0.999986" IsDecimal="true"></InvisibleData><InvisibleData Id="17.0" Text="1.4E-5" IsDecimal="true"></InvisibleData></Branch><Node Text="Oxyporus parvus10 CNUIC639" IsDecimal="false" UniqueName="eks9xxbjie" TextColor="#000000" TextHeight="6.0" TextStyle="" FontFamily="Arial" DecimalFormat="#0.0#####" LocaleLang="en" LocaleCountry="" LocaleVariant="" LineColor="#000000" LineWidth="0.3" EdgeRadius="1.0"><LeafMargin Left="1.0" Top="0.3" Right="1.0" Bottom="0.3"></LeafMargin><Branch Length="0.001059266" LineColor="#000000" LineWidth="0.3" ConstantWidth="false" MinLength="4.0" MinSpaceAbove="0.0" MinSpaceBelow="0.0"></Branch></Node><Node Text="Oxyporus parvus3 CNUIC602" IsDecimal="false" UniqueName="erub0u8wwu" TextColor="#000000" TextHeight="6.0" TextStyle="" FontFamily="Arial" DecimalFormat="#0.0#####" LocaleLang="en" LocaleCountry="" LocaleVariant="" LineColor="#000000" LineWidth="0.3" EdgeRadius="1.0"><LeafMargin Left="1.0" Top="0.3" Right="1.0" Bottom="0.3"></LeafMargin><Branch Length="0.00107293" LineColor="#000000" LineWidth="0.3" ConstantWidth="false" MinLength="4.0" MinSpaceAbove="0.0" MinSpaceBelow="0.0"></Branch></Node></Node></Node><Node Text="internalNode26" IsDecimal="false" UniqueName="q7z0mftfw7" TextColor="#000000" TextHeight="6.0" TextStyle="" FontFamily="Arial" DecimalFormat="#0.0#####" LocaleLang="en" LocaleCountry="" LocaleVariant="" LineColor="#000000" LineWidth="0.3" EdgeRadius="1.0"><LeafMargin Left="1.0" Top="0.3" Right="1.0" Bottom="0.3"></LeafMargin><Branch Length="0.01567575" LineColor="#000000" LineWidth="0.3" ConstantWidth="false" MinLength="4.0" MinSpaceAbove="0.0" MinSpaceBelow="0.0"><PieChartLabel TextColor="#000000" TextHeight="6.0" TextStyle="" FontFamily="Arial" DecimalFormat="#0.0#####" LocaleLang="en" LocaleCountry="" LocaleVariant="" LineColor="#000000" LineWidth="0.3" Width="6.0" Height="6.0" InternalLines="true" NullLines="false" ShowTitle="false" CaptionType="NONE" CaptionLinkType="STRAIGHT_LINES" Id="17" Above="true" LineNo="0" LinePos="0.0"><LabelMargin Left="1.0" Top="1.0" Right="1.0" Bottom="1.0"></LabelMargin><DataIds TextColor="#000000" TextStyle="" FontFamily="Arial" DecimalFormat="#0.0#####" LocaleLang="en" LocaleCountry="" LocaleVariant=""><DataId PieColor="#0000FF" PieCaption="">17.0</DataId><DataId PieColor="#FF0000" PieCaption="">17.1</DataId></DataIds></PieChartLabel><InvisibleData Id="17.1" Text="0.991365" IsDecimal="true"></InvisibleData><InvisibleData Id="17.0" Text="0.008635" IsDecimal="true"></InvisibleData></Branch><Node Text="internalNode42" IsDecimal="false" UniqueName="hq59c77550" TextColor="#000000" TextHeight="6.0" TextStyle="" FontFamily="Arial" DecimalFormat="#0.0#####" LocaleLang="en" LocaleCountry="" LocaleVariant="" LineColor="#000000" LineWidth="0.3" EdgeRadius="1.0"><LeafMargin Left="1.0" Top="0.3" Right="1.0" Bottom="0.3"></LeafMargin><Branch Length="0.05090168" LineColor="#000000" LineWidth="0.3" ConstantWidth="false" MinLength="4.0" MinSpaceAbove="0.0" MinSpaceBelow="0.0"><PieChartLabel TextColor="#000000" TextHeight="6.0" TextStyle="" FontFamily="Arial" DecimalFormat="#0.0#####" LocaleLang="en" LocaleCountry="" LocaleVariant="" LineColor="#000000" LineWidth="0.3" Width="6.0" Height="6.0" InternalLines="true" NullLines="false" ShowTitle="false" CaptionType="NONE" CaptionLinkType="STRAIGHT_LINES" Id="17" Above="true" LineNo="0" LinePos="0.0"><LabelMargin Left="1.0" Top="1.0" Right="1.0" Bottom="1.0"></LabelMargin><DataIds TextColor="#000000" TextStyle="" FontFamily="Arial" DecimalFormat="#0.0#####" LocaleLang="en" LocaleCountry="" LocaleVariant=""><DataId PieColor="#0000FF" PieCaption="">17.0</DataId><DataId PieColor="#FF0000" PieCaption="">17.1</DataId></DataIds></PieChartLabel><InvisibleData Id="17.1" Text="0.999726" IsDecimal="true"></InvisibleData><InvisibleData Id="17.0" Text="2.74E-4" IsDecimal="true"></InvisibleData></Branch><Node Text="Oxyporus procerus CNUIC590" IsDecimal="false" UniqueName="n18r5nhzrs" TextColor="#000000" TextHeight="6.0" TextStyle="" FontFamily="Arial" DecimalFormat="#0.0#####" LocaleLang="en" LocaleCountry="" LocaleVariant="" LineColor="#000000" LineWidth="0.3" EdgeRadius="1.0"><LeafMargin Left="1.0" Top="0.3" Right="1.0" Bottom="0.3"></LeafMargin><Branch Length="0.005374603" LineColor="#000000" LineWidth="0.3" ConstantWidth="false" MinLength="4.0" MinSpaceAbove="0.0" MinSpaceBelow="0.0"></Branch></Node><Node Text="internalNode43" IsDecimal="false" UniqueName="vnpwtew5r1" TextColor="#000000" TextHeight="6.0" TextStyle="" FontFamily="Arial" DecimalFormat="#0.0#####" LocaleLang="en" LocaleCountry="" LocaleVariant="" LineColor="#000000" LineWidth="0.3" EdgeRadius="1.0"><LeafMargin Left="1.0" Top="0.3" Right="1.0" Bottom="0.3"></LeafMargin><Branch Length="0.00423988" LineColor="#000000" LineWidth="0.3" ConstantWidth="false" MinLength="4.0" MinSpaceAbove="0.0" MinSpaceBelow="0.0"><PieChartLabel TextColor="#000000" TextHeight="6.0" TextStyle="" FontFamily="Arial" DecimalFormat="#0.0#####" LocaleLang="en" LocaleCountry="" LocaleVariant="" LineColor="#000000" LineWidth="0.3" Width="6.0" Height="6.0" InternalLines="true" NullLines="false" ShowTitle="false" CaptionType="NONE" CaptionLinkType="STRAIGHT_LINES" Id="17" Above="true" LineNo="0" LinePos="0.0"><LabelMargin Left="1.0" Top="1.0" Right="1.0" Bottom="1.0"></LabelMargin><DataIds TextColor="#000000" TextStyle="" FontFamily="Arial" DecimalFormat="#0.0#####" LocaleLang="en" LocaleCountry="" LocaleVariant=""><DataId PieColor="#0000FF" PieCaption="">17.0</DataId><DataId PieColor="#FF0000" PieCaption="">17.1</DataId></DataIds></PieChartLabel><InvisibleData Id="17.1" Text="0.999987" IsDecimal="true"></InvisibleData><InvisibleData Id="17.0" Text="1.3E-5" IsDecimal="true"></InvisibleData></Branch><Node Text="Oxyporus procerus GornTaezhFE18" IsDecimal="false" UniqueName="pfnt0xfy0e" TextColor="#000000" TextHeight="6.0" TextStyle="" FontFamily="Arial" DecimalFormat="#0.0#####" LocaleLang="en" LocaleCountry="" LocaleVariant="" LineColor="#000000" LineWidth="0.3" EdgeRadius="1.0"><LeafMargin Left="1.0" Top="0.3" Right="1.0" Bottom="0.3"></LeafMargin><Branch Length="0.001027912" LineColor="#000000" LineWidth="0.3" ConstantWidth="false" MinLength="4.0" MinSpaceAbove="0.0" MinSpaceBelow="0.0"></Branch></Node><Node Text="Oxyporus procerus larvaGornTaezhFE18" IsDecimal="false" UniqueName="02aodqk2sx" TextColor="#000000" TextHeight="6.0" TextStyle="" FontFamily="Arial" DecimalFormat="#0.0#####" LocaleLang="en" LocaleCountry="" LocaleVariant="" LineColor="#000000" LineWidth="0.3" EdgeRadius="1.0"><LeafMargin Left="1.0" Top="0.3" Right="1.0" Bottom="0.3"></LeafMargin><Branch Length="0.001036376" LineColor="#000000" LineWidth="0.3" ConstantWidth="false" MinLength="4.0" MinSpaceAbove="0.0" MinSpaceBelow="0.0"></Branch></Node></Node></Node><Node Text="internalNode27" IsDecimal="false" UniqueName="c2cxvly24w" TextColor="#000000" TextHeight="6.0" TextStyle="" FontFamily="Arial" DecimalFormat="#0.0#####" LocaleLang="en" LocaleCountry="" LocaleVariant="" LineColor="#000000" LineWidth="0.3" EdgeRadius="1.0"><LeafMargin Left="1.0" Top="0.3" Right="1.0" Bottom="0.3"></LeafMargin><Branch Length="0.0132556" LineColor="#000000" LineWidth="0.3" ConstantWidth="false" MinLength="4.0" MinSpaceAbove="0.0" MinSpaceBelow="0.0"><PieChartLabel TextColor="#000000" TextHeight="6.0" TextStyle="" FontFamily="Arial" DecimalFormat="#0.0#####" LocaleLang="en" LocaleCountry="" LocaleVariant="" LineColor="#000000" LineWidth="0.3" Width="6.0" Height="6.0" InternalLines="true" NullLines="false" ShowTitle="false" CaptionType="NONE" CaptionLinkType="STRAIGHT_LINES" Id="17" Above="true" LineNo="0" LinePos="0.0"><LabelMargin Left="1.0" Top="1.0" Right="1.0" Bottom="1.0"></LabelMargin><DataIds TextColor="#000000" TextStyle="" FontFamily="Arial" DecimalFormat="#0.0#####" LocaleLang="en" LocaleCountry="" LocaleVariant=""><DataId PieColor="#0000FF" PieCaption="">17.0</DataId><DataId PieColor="#FF0000" PieCaption="">17.1</DataId></DataIds></PieChartLabel><InvisibleData Id="17.1" Text="0.995133" IsDecimal="true"></InvisibleData><InvisibleData Id="17.0" Text="0.004867" IsDecimal="true"></InvisibleData></Branch><Node Text="internalNode38" IsDecimal="false" UniqueName="y94zyz53a6" TextColor="#000000" TextHeight="6.0" TextStyle="" FontFamily="Arial" DecimalFormat="#0.0#####" LocaleLang="en" LocaleCountry="" LocaleVariant="" LineColor="#000000" LineWidth="0.3" EdgeRadius="1.0"><LeafMargin Left="1.0" Top="0.3" Right="1.0" Bottom="0.3"></LeafMargin><Branch Length="0.0278175" LineColor="#000000" LineWidth="0.3" ConstantWidth="false" MinLength="4.0" MinSpaceAbove="0.0" MinSpaceBelow="0.0"><PieChartLabel TextColor="#000000" TextHeight="6.0" TextStyle="" FontFamily="Arial" DecimalFormat="#0.0#####" LocaleLang="en" LocaleCountry="" LocaleVariant="" LineColor="#000000" LineWidth="0.3" Width="6.0" Height="6.0" InternalLines="true" NullLines="false" ShowTitle="false" CaptionType="NONE" CaptionLinkType="STRAIGHT_LINES" Id="17" Above="true" LineNo="0" LinePos="0.0"><LabelMargin Left="1.0" Top="1.0" Right="1.0" Bottom="1.0"></LabelMargin><DataIds TextColor="#000000" TextStyle="" FontFamily="Arial" DecimalFormat="#0.0#####" LocaleLang="en" LocaleCountry="" LocaleVariant=""><DataId PieColor="#0000FF" PieCaption="">17.0</DataId><DataId PieColor="#FF0000" PieCaption="">17.1</DataId></DataIds></PieChartLabel><InvisibleData Id="17.1" Text="0.999997" IsDecimal="true"></InvisibleData><InvisibleData Id="17.0" Text="3.0E-6" IsDecimal="true"></InvisibleData></Branch><Node Text="Oxyporus niger AnisimFE19 27" IsDecimal="false" UniqueName="g4lcshxg7j" TextColor="#000000" TextHeight="6.0" TextStyle="" FontFamily="Arial" DecimalFormat="#0.0#####" LocaleLang="en" LocaleCountry="" LocaleVariant="" LineColor="#000000" LineWidth="0.3" EdgeRadius="1.0"><LeafMargin Left="1.0" Top="0.3" Right="1.0" Bottom="0.3"></LeafMargin><Branch Length="0.003877145" LineColor="#000000" LineWidth="0.3" ConstantWidth="false" MinLength="4.0" MinSpaceAbove="0.0" MinSpaceBelow="0.0"></Branch></Node><Node Text="internalNode39" IsDecimal="false" UniqueName="j6uus7v6yx" TextColor="#000000" TextHeight="6.0" TextStyle="" FontFamily="Arial" DecimalFormat="#0.0#####" LocaleLang="en" LocaleCountry="" LocaleVariant="" LineColor="#000000" LineWidth="0.3" EdgeRadius="1.0"><LeafMargin Left="1.0" Top="0.3" Right="1.0" Bottom="0.3"></LeafMargin><Branch Length="0.006298653" LineColor="#000000" LineWidth="0.3" ConstantWidth="false" MinLength="4.0" MinSpaceAbove="0.0" MinSpaceBelow="0.0"><PieChartLabel TextColor="#000000" TextHeight="6.0" TextStyle="" FontFamily="Arial" DecimalFormat="#0.0#####" LocaleLang="en" LocaleCountry="" LocaleVariant="" LineColor="#000000" LineWidth="0.3" Width="6.0" Height="6.0" InternalLines="true" NullLines="false" ShowTitle="false" CaptionType="NONE" CaptionLinkType="STRAIGHT_LINES" Id="17" Above="true" LineNo="0" LinePos="0.0"><LabelMargin Left="1.0" Top="1.0" Right="1.0" Bottom="1.0"></LabelMargin><DataIds TextColor="#000000" TextStyle="" FontFamily="Arial" DecimalFormat="#0.0#####" LocaleLang="en" LocaleCountry="" LocaleVariant=""><DataId PieColor="#0000FF" PieCaption="">17.0</DataId><DataId PieColor="#FF0000" PieCaption="">17.1</DataId></DataIds></PieChartLabel><InvisibleData Id="17.1" Text="0.999835" IsDecimal="true"></InvisibleData><InvisibleData Id="17.0" Text="1.65E-4" IsDecimal="true"></InvisibleData></Branch><Node Text="Oxyporus niger GornTaezhFE18 29" IsDecimal="false" UniqueName="rxv5gi7tmd" TextColor="#000000" TextHeight="6.0" TextStyle="" FontFamily="Arial" DecimalFormat="#0.0#####" LocaleLang="en" LocaleCountry="" LocaleVariant="" LineColor="#000000" LineWidth="0.3" EdgeRadius="1.0"><LeafMargin Left="1.0" Top="0.3" Right="1.0" Bottom="0.3"></LeafMargin><Branch Length="0.002550665" LineColor="#000000" LineWidth="0.3" ConstantWidth="false" MinLength="4.0" MinSpaceAbove="0.0" MinSpaceBelow="0.0"></Branch></Node><Node Text="Oxyporus niger ListvFE19 31" IsDecimal="false" UniqueName="210w1pzsf9" TextColor="#000000" TextHeight="6.0" TextStyle="" FontFamily="Arial" DecimalFormat="#0.0#####" LocaleLang="en" LocaleCountry="" LocaleVariant="" LineColor="#000000" LineWidth="0.3" EdgeRadius="1.0"><LeafMargin Left="1.0" Top="0.3" Right="1.0" Bottom="0.3"></LeafMargin><Branch Length="0.005380707" LineColor="#000000" LineWidth="0.3" ConstantWidth="false" MinLength="4.0" MinSpaceAbove="0.0" MinSpaceBelow="0.0"></Branch></Node></Node><Node Text="internalNode40" IsDecimal="false" UniqueName="368sracmpp" TextColor="#000000" TextHeight="6.0" TextStyle="" FontFamily="Arial" DecimalFormat="#0.0#####" LocaleLang="en" LocaleCountry="" LocaleVariant="" LineColor="#000000" LineWidth="0.3" EdgeRadius="1.0"><LeafMargin Left="1.0" Top="0.3" Right="1.0" Bottom="0.3"></LeafMargin><Branch Length="0.002559094" LineColor="#000000" LineWidth="0.3" ConstantWidth="false" MinLength="4.0" MinSpaceAbove="0.0" MinSpaceBelow="0.0"><PieChartLabel TextColor="#000000" TextHeight="6.0" TextStyle="" FontFamily="Arial" DecimalFormat="#0.0#####" LocaleLang="en" LocaleCountry="" LocaleVariant="" LineColor="#000000" LineWidth="0.3" Width="6.0" Height="6.0" InternalLines="true" NullLines="false" ShowTitle="false" CaptionType="NONE" CaptionLinkType="STRAIGHT_LINES" Id="17" Above="true" LineNo="0" LinePos="0.0"><LabelMargin Left="1.0" Top="1.0" Right="1.0" Bottom="1.0"></LabelMargin><DataIds TextColor="#000000" TextStyle="" FontFamily="Arial" DecimalFormat="#0.0#####" LocaleLang="en" LocaleCountry="" LocaleVariant=""><DataId PieColor="#0000FF" PieCaption="">17.0</DataId><DataId PieColor="#FF0000" PieCaption="">17.1</DataId></DataIds></PieChartLabel><InvisibleData Id="17.1" Text="0.999221" IsDecimal="true"></InvisibleData><InvisibleData Id="17.0" Text="7.79E-4" IsDecimal="true"></InvisibleData></Branch><Node Text="Oxyporus niger1 CNUIC 0576" IsDecimal="false" UniqueName="ofi5c2sfjc" TextColor="#000000" TextHeight="6.0" TextStyle="" FontFamily="Arial" DecimalFormat="#0.0#####" LocaleLang="en" LocaleCountry="" LocaleVariant="" LineColor="#000000" LineWidth="0.3" EdgeRadius="1.0"><LeafMargin Left="1.0" Top="0.3" Right="1.0" Bottom="0.3"></LeafMargin><Branch Length="0.005535998" LineColor="#000000" LineWidth="0.3" ConstantWidth="false" MinLength="4.0" MinSpaceAbove="0.0" MinSpaceBelow="0.0"></Branch></Node><Node Text="internalNode41" IsDecimal="false" UniqueName="ptqmk42qhx" TextColor="#000000" TextHeight="6.0" TextStyle="" FontFamily="Arial" DecimalFormat="#0.0#####" LocaleLang="en" LocaleCountry="" LocaleVariant="" LineColor="#000000" LineWidth="0.3" EdgeRadius="1.0"><LeafMargin Left="1.0" Top="0.3" Right="1.0" Bottom="0.3"></LeafMargin><Branch Length="0.01177475" LineColor="#000000" LineWidth="0.3" ConstantWidth="false" MinLength="4.0" MinSpaceAbove="0.0" MinSpaceBelow="0.0"><PieChartLabel TextColor="#000000" TextHeight="6.0" TextStyle="" FontFamily="Arial" DecimalFormat="#0.0#####" LocaleLang="en" LocaleCountry="" LocaleVariant="" LineColor="#000000" LineWidth="0.3" Width="6.0" Height="6.0" InternalLines="true" NullLines="false" ShowTitle="false" CaptionType="NONE" CaptionLinkType="STRAIGHT_LINES" Id="17" Above="true" LineNo="0" LinePos="0.0"><LabelMargin Left="1.0" Top="1.0" Right="1.0" Bottom="1.0"></LabelMargin><DataIds TextColor="#000000" TextStyle="" FontFamily="Arial" DecimalFormat="#0.0#####" LocaleLang="en" LocaleCountry="" LocaleVariant=""><DataId PieColor="#0000FF" PieCaption="">17.0</DataId><DataId PieColor="#FF0000" PieCaption="">17.1</DataId></DataIds></PieChartLabel><InvisibleData Id="17.1" Text="0.999988" IsDecimal="true"></InvisibleData><InvisibleData Id="17.0" Text="1.2E-5" IsDecimal="true"></InvisibleData></Branch><Node Text="Oxyporus niger5 CNUIC 0580" IsDecimal="false" UniqueName="kish0kcw5i" TextColor="#000000" TextHeight="6.0" TextStyle="" FontFamily="Arial" DecimalFormat="#0.0#####" LocaleLang="en" LocaleCountry="" LocaleVariant="" LineColor="#000000" LineWidth="0.3" EdgeRadius="1.0"><LeafMargin Left="1.0" Top="0.3" Right="1.0" Bottom="0.3"></LeafMargin><Branch Length="9.954876E-4" LineColor="#000000" LineWidth="0.3" ConstantWidth="false" MinLength="4.0" MinSpaceAbove="0.0" MinSpaceBelow="0.0"></Branch></Node><Node Text="Oxyporus niger6 CNUIC 0581" IsDecimal="false" UniqueName="lf9gqk0umj" TextColor="#000000" TextHeight="6.0" TextStyle="" FontFamily="Arial" DecimalFormat="#0.0#####" LocaleLang="en" LocaleCountry="" LocaleVariant="" LineColor="#000000" LineWidth="0.3" EdgeRadius="1.0"><LeafMargin Left="1.0" Top="0.3" Right="1.0" Bottom="0.3"></LeafMargin><Branch Length="9.993335E-4" LineColor="#000000" LineWidth="0.3" ConstantWidth="false" MinLength="4.0" MinSpaceAbove="0.0" MinSpaceBelow="0.0"></Branch></Node></Node></Node></Node><Node Text="internalNode28" IsDecimal="false" UniqueName="k9w6c37bwh" TextColor="#000000" TextHeight="6.0" TextStyle="" FontFamily="Arial" DecimalFormat="#0.0#####" LocaleLang="en" LocaleCountry="" LocaleVariant="" LineColor="#000000" LineWidth="0.3" EdgeRadius="1.0"><LeafMargin Left="1.0" Top="0.3" Right="1.0" Bottom="0.3"></LeafMargin><Branch Length="0.01488225" LineColor="#000000" LineWidth="0.3" ConstantWidth="false" MinLength="4.0" MinSpaceAbove="0.0" MinSpaceBelow="0.0"><PieChartLabel TextColor="#000000" TextHeight="6.0" TextStyle="" FontFamily="Arial" DecimalFormat="#0.0#####" LocaleLang="en" LocaleCountry="" LocaleVariant="" LineColor="#000000" LineWidth="0.3" Width="6.0" Height="6.0" InternalLines="true" NullLines="false" ShowTitle="false" CaptionType="NONE" CaptionLinkType="STRAIGHT_LINES" Id="17" Above="true" LineNo="0" LinePos="0.0"><LabelMargin Left="1.0" Top="1.0" Right="1.0" Bottom="1.0"></LabelMargin><DataIds TextColor="#000000" TextStyle="" FontFamily="Arial" DecimalFormat="#0.0#####" LocaleLang="en" LocaleCountry="" LocaleVariant=""><DataId PieColor="#0000FF" PieCaption="">17.0</DataId><DataId PieColor="#FF0000" PieCaption="">17.1</DataId></DataIds></PieChartLabel><InvisibleData Id="17.1" Text="1.0" IsDecimal="true"></InvisibleData><InvisibleData Id="17.0" Text="0.0" IsDecimal="true"></InvisibleData></Branch><Node Text="internalNode29" IsDecimal="false" UniqueName="4bd3ud8yki" TextColor="#000000" TextHeight="6.0" TextStyle="" FontFamily="Arial" DecimalFormat="#0.0#####" LocaleLang="en" LocaleCountry="" LocaleVariant="" LineColor="#000000" LineWidth="0.3" EdgeRadius="1.0"><LeafMargin Left="1.0" Top="0.3" Right="1.0" Bottom="0.3"></LeafMargin><Branch Length="0.002466102" LineColor="#000000" LineWidth="0.3" ConstantWidth="false" MinLength="4.0" MinSpaceAbove="0.0" MinSpaceBelow="0.0"><PieChartLabel TextColor="#000000" TextHeight="6.0" TextStyle="" FontFamily="Arial" DecimalFormat="#0.0#####" LocaleLang="en" LocaleCountry="" LocaleVariant="" LineColor="#000000" LineWidth="0.3" Width="6.0" Height="6.0" InternalLines="true" NullLines="false" ShowTitle="false" CaptionType="NONE" CaptionLinkType="STRAIGHT_LINES" Id="17" Above="true" LineNo="0" LinePos="0.0"><LabelMargin Left="1.0" Top="1.0" Right="1.0" Bottom="1.0"></LabelMargin><DataIds TextColor="#000000" TextStyle="" FontFamily="Arial" DecimalFormat="#0.0#####" LocaleLang="en" LocaleCountry="" LocaleVariant=""><DataId PieColor="#0000FF" PieCaption="">17.0</DataId><DataId PieColor="#FF0000" PieCaption="">17.1</DataId></DataIds></PieChartLabel><InvisibleData Id="17.1" Text="1.0" IsDecimal="true"></InvisibleData><InvisibleData Id="17.0" Text="0.0" IsDecimal="true"></InvisibleData></Branch><Node Text="internalNode30" IsDecimal="false" UniqueName="4exblbhnfw" TextColor="#000000" TextHeight="6.0" TextStyle="" FontFamily="Arial" DecimalFormat="#0.0#####" LocaleLang="en" LocaleCountry="" LocaleVariant="" LineColor="#000000" LineWidth="0.3" EdgeRadius="1.0"><LeafMargin Left="1.0" Top="0.3" Right="1.0" Bottom="0.3"></LeafMargin><Branch Length="0.003365055" LineColor="#000000" LineWidth="0.3" ConstantWidth="false" MinLength="4.0" MinSpaceAbove="0.0" MinSpaceBelow="0.0"><PieChartLabel TextColor="#000000" TextHeight="6.0" TextStyle="" FontFamily="Arial" DecimalFormat="#0.0#####" LocaleLang="en" LocaleCountry="" LocaleVariant="" LineColor="#000000" LineWidth="0.3" Width="6.0" Height="6.0" InternalLines="true" NullLines="false" ShowTitle="false" CaptionType="NONE" CaptionLinkType="STRAIGHT_LINES" Id="17" Above="true" LineNo="0" LinePos="0.0"><LabelMargin Left="1.0" Top="1.0" Right="1.0" Bottom="1.0"></LabelMargin><DataIds TextColor="#000000" TextStyle="" FontFamily="Arial" DecimalFormat="#0.0#####" LocaleLang="en" LocaleCountry="" LocaleVariant=""><DataId PieColor="#0000FF" PieCaption="">17.0</DataId><DataId PieColor="#FF0000" PieCaption="">17.1</DataId></DataIds></PieChartLabel><InvisibleData Id="17.1" Text="0.999883" IsDecimal="true"></InvisibleData><InvisibleData Id="17.0" Text="1.17E-4" IsDecimal="true"></InvisibleData></Branch><Node Text="internalNode31" IsDecimal="false" UniqueName="pwpu7yqnwp" TextColor="#000000" TextHeight="6.0" TextStyle="" FontFamily="Arial" DecimalFormat="#0.0#####" LocaleLang="en" LocaleCountry="" LocaleVariant="" LineColor="#000000" LineWidth="0.3" EdgeRadius="1.0"><LeafMargin Left="1.0" Top="0.3" Right="1.0" Bottom="0.3"></LeafMargin><Branch Length="0.004087485" LineColor="#000000" LineWidth="0.3" ConstantWidth="false" MinLength="4.0" MinSpaceAbove="0.0" MinSpaceBelow="0.0"><PieChartLabel TextColor="#000000" TextHeight="6.0" TextStyle="" FontFamily="Arial" DecimalFormat="#0.0#####" LocaleLang="en" LocaleCountry="" LocaleVariant="" LineColor="#000000" LineWidth="0.3" Width="6.0" Height="6.0" InternalLines="true" NullLines="false" ShowTitle="false" CaptionType="NONE" CaptionLinkType="STRAIGHT_LINES" Id="17" Above="true" LineNo="0" LinePos="0.0"><LabelMargin Left="1.0" Top="1.0" Right="1.0" Bottom="1.0"></LabelMargin><DataIds TextColor="#000000" TextStyle="" FontFamily="Arial" DecimalFormat="#0.0#####" LocaleLang="en" LocaleCountry="" LocaleVariant=""><DataId PieColor="#0000FF" PieCaption="">17.0</DataId><DataId PieColor="#FF0000" PieCaption="">17.1</DataId></DataIds></PieChartLabel><InvisibleData Id="17.1" Text="0.999969" IsDecimal="true"></InvisibleData><InvisibleData Id="17.0" Text="3.1E-5" IsDecimal="true"></InvisibleData></Branch><Node Text="Oxyporus aokii AnisimFE19 21" IsDecimal="false" UniqueName="clw8osecwk" TextColor="#000000" TextHeight="6.0" TextStyle="" FontFamily="Arial" DecimalFormat="#0.0#####" LocaleLang="en" LocaleCountry="" LocaleVariant="" LineColor="#000000" LineWidth="0.3" EdgeRadius="1.0"><LeafMargin Left="1.0" Top="0.3" Right="1.0" Bottom="0.3"></LeafMargin><Branch Length="0.001037892" LineColor="#000000" LineWidth="0.3" ConstantWidth="false" MinLength="4.0" MinSpaceAbove="0.0" MinSpaceBelow="0.0"></Branch></Node><Node Text="Oxyporus aokii GornTaezhFE18 04" IsDecimal="false" UniqueName="7qqyvnzmdd" TextColor="#000000" TextHeight="6.0" TextStyle="" FontFamily="Arial" DecimalFormat="#0.0#####" LocaleLang="en" LocaleCountry="" LocaleVariant="" LineColor="#000000" LineWidth="0.3" EdgeRadius="1.0"><LeafMargin Left="1.0" Top="0.3" Right="1.0" Bottom="0.3"></LeafMargin><Branch Length="0.002503332" LineColor="#000000" LineWidth="0.3" ConstantWidth="false" MinLength="4.0" MinSpaceAbove="0.0" MinSpaceBelow="0.0"></Branch></Node></Node><Node Text="Oxyporus basiventris GornTaezhFE18 01" IsDecimal="false" UniqueName="3xy2qpp1nz" TextColor="#000000" TextHeight="6.0" TextStyle="" FontFamily="Arial" DecimalFormat="#0.0#####" LocaleLang="en" LocaleCountry="" LocaleVariant="" LineColor="#000000" LineWidth="0.3" EdgeRadius="1.0"><LeafMargin Left="1.0" Top="0.3" Right="1.0" Bottom="0.3"></LeafMargin><Branch Length="0.002371015" LineColor="#000000" LineWidth="0.3" ConstantWidth="false" MinLength="4.0" MinSpaceAbove="0.0" MinSpaceBelow="0.0"></Branch></Node></Node><Node Text="internalNode32" IsDecimal="false" UniqueName="2uyb9k9dv2" TextColor="#000000" TextHeight="6.0" TextStyle="" FontFamily="Arial" DecimalFormat="#0.0#####" LocaleLang="en" LocaleCountry="" LocaleVariant="" LineColor="#000000" LineWidth="0.3" EdgeRadius="1.0"><LeafMargin Left="1.0" Top="0.3" Right="1.0" Bottom="0.3"></LeafMargin><Branch Length="0.007527675" LineColor="#000000" LineWidth="0.3" ConstantWidth="false" MinLength="4.0" MinSpaceAbove="0.0" MinSpaceBelow="0.0"><PieChartLabel TextColor="#000000" TextHeight="6.0" TextStyle="" FontFamily="Arial" DecimalFormat="#0.0#####" LocaleLang="en" LocaleCountry="" LocaleVariant="" LineColor="#000000" LineWidth="0.3" Width="6.0" Height="6.0" InternalLines="true" NullLines="false" ShowTitle="false" CaptionType="NONE" CaptionLinkType="STRAIGHT_LINES" Id="17" Above="true" LineNo="0" LinePos="0.0"><LabelMargin Left="1.0" Top="1.0" Right="1.0" Bottom="1.0"></LabelMargin><DataIds TextColor="#000000" TextStyle="" FontFamily="Arial" DecimalFormat="#0.0#####" LocaleLang="en" LocaleCountry="" LocaleVariant=""><DataId PieColor="#0000FF" PieCaption="">17.0</DataId><DataId PieColor="#FF0000" PieCaption="">17.1</DataId></DataIds></PieChartLabel><InvisibleData Id="17.1" Text="0.999804" IsDecimal="true"></InvisibleData><InvisibleData Id="17.0" Text="1.96E-4" IsDecimal="true"></InvisibleData></Branch><Node Text="Oxyporus basiventris Kunashir 19 173" IsDecimal="false" UniqueName="pc0hkdr3sa" TextColor="#000000" TextHeight="6.0" TextStyle="" FontFamily="Arial" DecimalFormat="#0.0#####" LocaleLang="en" LocaleCountry="" LocaleVariant="" LineColor="#000000" LineWidth="0.3" EdgeRadius="1.0"><LeafMargin Left="1.0" Top="0.3" Right="1.0" Bottom="0.3"></LeafMargin><Branch Length="0.002324215" LineColor="#000000" LineWidth="0.3" ConstantWidth="false" MinLength="4.0" MinSpaceAbove="0.0" MinSpaceBelow="0.0"></Branch></Node><Node Text="Oxyporus basiventris Kunashir 19 174" IsDecimal="false" UniqueName="nh4u8awif5" TextColor="#000000" TextHeight="6.0" TextStyle="" FontFamily="Arial" DecimalFormat="#0.0#####" LocaleLang="en" LocaleCountry="" LocaleVariant="" LineColor="#000000" LineWidth="0.3" EdgeRadius="1.0"><LeafMargin Left="1.0" Top="0.3" Right="1.0" Bottom="0.3"></LeafMargin><Branch Length="0.007028374" LineColor="#000000" LineWidth="0.3" ConstantWidth="false" MinLength="4.0" MinSpaceAbove="0.0" MinSpaceBelow="0.0"></Branch></Node></Node><Node Text="internalNode33" IsDecimal="false" UniqueName="brq03k6pv4" TextColor="#000000" TextHeight="6.0" TextStyle="" FontFamily="Arial" DecimalFormat="#0.0#####" LocaleLang="en" LocaleCountry="" LocaleVariant="" LineColor="#000000" LineWidth="0.3" EdgeRadius="1.0"><LeafMargin Left="1.0" Top="0.3" Right="1.0" Bottom="0.3"></LeafMargin><Branch Length="0.004151708" LineColor="#000000" LineWidth="0.3" ConstantWidth="false" MinLength="4.0" MinSpaceAbove="0.0" MinSpaceBelow="0.0"><PieChartLabel TextColor="#000000" TextHeight="6.0" TextStyle="" FontFamily="Arial" DecimalFormat="#0.0#####" LocaleLang="en" LocaleCountry="" LocaleVariant="" LineColor="#000000" LineWidth="0.3" Width="6.0" Height="6.0" InternalLines="true" NullLines="false" ShowTitle="false" CaptionType="NONE" CaptionLinkType="STRAIGHT_LINES" Id="17" Above="true" LineNo="0" LinePos="0.0"><LabelMargin Left="1.0" Top="1.0" Right="1.0" Bottom="1.0"></LabelMargin><DataIds TextColor="#000000" TextStyle="" FontFamily="Arial" DecimalFormat="#0.0#####" LocaleLang="en" LocaleCountry="" LocaleVariant=""><DataId PieColor="#0000FF" PieCaption="">17.0</DataId><DataId PieColor="#FF0000" PieCaption="">17.1</DataId></DataIds></PieChartLabel><InvisibleData Id="17.1" Text="0.999798" IsDecimal="true"></InvisibleData><InvisibleData Id="17.0" Text="2.02E-4" IsDecimal="true"></InvisibleData></Branch><Node Text="Oxyporus basiventris PogranFE19 20" IsDecimal="false" UniqueName="mfcfkt7x35" TextColor="#000000" TextHeight="6.0" TextStyle="" FontFamily="Arial" DecimalFormat="#0.0#####" LocaleLang="en" LocaleCountry="" LocaleVariant="" LineColor="#000000" LineWidth="0.3" EdgeRadius="1.0"><LeafMargin Left="1.0" Top="0.3" Right="1.0" Bottom="0.3"></LeafMargin><Branch Length="0.003857879" LineColor="#000000" LineWidth="0.3" ConstantWidth="false" MinLength="4.0" MinSpaceAbove="0.0" MinSpaceBelow="0.0"></Branch></Node><Node Text="Oxyporus maxillosus Pogran19 02" IsDecimal="false" UniqueName="7mz7e70n7m" TextColor="#000000" TextHeight="6.0" TextStyle="" FontFamily="Arial" DecimalFormat="#0.0#####" LocaleLang="en" LocaleCountry="" LocaleVariant="" LineColor="#000000" LineWidth="0.3" EdgeRadius="1.0"><LeafMargin Left="1.0" Top="0.3" Right="1.0" Bottom="0.3"></LeafMargin><Branch Length="0.004361509" LineColor="#000000" LineWidth="0.3" ConstantWidth="false" MinLength="4.0" MinSpaceAbove="0.0" MinSpaceBelow="0.0"></Branch></Node></Node><Node Text="internalNode34" IsDecimal="false" UniqueName="bz3rv0qhv9" TextColor="#000000" TextHeight="6.0" TextStyle="" FontFamily="Arial" DecimalFormat="#0.0#####" LocaleLang="en" LocaleCountry="" LocaleVariant="" LineColor="#000000" LineWidth="0.3" EdgeRadius="1.0"><LeafMargin Left="1.0" Top="0.3" Right="1.0" Bottom="0.3"></LeafMargin><Branch Length="0.00891202" LineColor="#000000" LineWidth="0.3" ConstantWidth="false" MinLength="4.0" MinSpaceAbove="0.0" MinSpaceBelow="0.0"><PieChartLabel TextColor="#000000" TextHeight="6.0" TextStyle="" FontFamily="Arial" DecimalFormat="#0.0#####" LocaleLang="en" LocaleCountry="" LocaleVariant="" LineColor="#000000" LineWidth="0.3" Width="6.0" Height="6.0" InternalLines="true" NullLines="false" ShowTitle="false" CaptionType="NONE" CaptionLinkType="STRAIGHT_LINES" Id="17" Above="true" LineNo="0" LinePos="0.0"><LabelMargin Left="1.0" Top="1.0" Right="1.0" Bottom="1.0"></LabelMargin><DataIds TextColor="#000000" TextStyle="" FontFamily="Arial" DecimalFormat="#0.0#####" LocaleLang="en" LocaleCountry="" LocaleVariant=""><DataId PieColor="#0000FF" PieCaption="">17.0</DataId><DataId PieColor="#FF0000" PieCaption="">17.1</DataId></DataIds></PieChartLabel><InvisibleData Id="17.1" Text="0.999596" IsDecimal="true"></InvisibleData><InvisibleData Id="17.0" Text="4.04E-4" IsDecimal="true"></InvisibleData></Branch><Node Text="Oxyporus japonicus Honshu 19 176" IsDecimal="false" UniqueName="t8a0nzjuik" TextColor="#000000" TextHeight="6.0" TextStyle="" FontFamily="Arial" DecimalFormat="#0.0#####" LocaleLang="en" LocaleCountry="" LocaleVariant="" LineColor="#000000" LineWidth="0.3" EdgeRadius="1.0"><LeafMargin Left="1.0" Top="0.3" Right="1.0" Bottom="0.3"></LeafMargin><Branch Length="0.01085079" LineColor="#000000" LineWidth="0.3" ConstantWidth="false" MinLength="4.0" MinSpaceAbove="0.0" MinSpaceBelow="0.0"></Branch></Node><Node Text="Oxyporus maxillosus PrimKr 19 172" IsDecimal="false" UniqueName="9zn10ac3zw" TextColor="#000000" TextHeight="6.0" TextStyle="" FontFamily="Arial" DecimalFormat="#0.0#####" LocaleLang="en" LocaleCountry="" LocaleVariant="" LineColor="#000000" LineWidth="0.3" EdgeRadius="1.0"><LeafMargin Left="1.0" Top="0.3" Right="1.0" Bottom="0.3"></LeafMargin><Branch Length="0.003107555" LineColor="#000000" LineWidth="0.3" ConstantWidth="false" MinLength="4.0" MinSpaceAbove="0.0" MinSpaceBelow="0.0"></Branch></Node></Node><Node Text="Oxyporus japonicus1 CNUIC572" IsDecimal="false" UniqueName="4bqzvvc043" TextColor="#000000" TextHeight="6.0" TextStyle="" FontFamily="Arial" DecimalFormat="#0.0#####" LocaleLang="en" LocaleCountry="" LocaleVariant="" LineColor="#000000" LineWidth="0.3" EdgeRadius="1.0"><LeafMargin Left="1.0" Top="0.3" Right="1.0" Bottom="0.3"></LeafMargin><Branch Length="0.00170398" LineColor="#000000" LineWidth="0.3" ConstantWidth="false" MinLength="4.0" MinSpaceAbove="0.0" MinSpaceBelow="0.0"></Branch></Node><Node Text="internalNode35" IsDecimal="false" UniqueName="f8oqov6exe" TextColor="#000000" TextHeight="6.0" TextStyle="" FontFamily="Arial" DecimalFormat="#0.0#####" LocaleLang="en" LocaleCountry="" LocaleVariant="" LineColor="#000000" LineWidth="0.3" EdgeRadius="1.0"><LeafMargin Left="1.0" Top="0.3" Right="1.0" Bottom="0.3"></LeafMargin><Branch Length="0.002115912" LineColor="#000000" LineWidth="0.3" ConstantWidth="false" MinLength="4.0" MinSpaceAbove="0.0" MinSpaceBelow="0.0"><PieChartLabel TextColor="#000000" TextHeight="6.0" TextStyle="" FontFamily="Arial" DecimalFormat="#0.0#####" LocaleLang="en" LocaleCountry="" LocaleVariant="" LineColor="#000000" LineWidth="0.3" Width="6.0" Height="6.0" InternalLines="true" NullLines="false" ShowTitle="false" CaptionType="NONE" CaptionLinkType="STRAIGHT_LINES" Id="17" Above="true" LineNo="0" LinePos="0.0"><LabelMargin Left="1.0" Top="1.0" Right="1.0" Bottom="1.0"></LabelMargin><DataIds TextColor="#000000" TextStyle="" FontFamily="Arial" DecimalFormat="#0.0#####" LocaleLang="en" LocaleCountry="" LocaleVariant=""><DataId PieColor="#0000FF" PieCaption="">17.0</DataId><DataId PieColor="#FF0000" PieCaption="">17.1</DataId></DataIds></PieChartLabel><InvisibleData Id="17.1" Text="0.999965" IsDecimal="true"></InvisibleData><InvisibleData Id="17.0" Text="3.5E-5" IsDecimal="true"></InvisibleData></Branch><Node Text="Oxyporus japonicus10 CNUIC635" IsDecimal="false" UniqueName="ikpvw18cf8" TextColor="#000000" TextHeight="6.0" TextStyle="" FontFamily="Arial" DecimalFormat="#0.0#####" LocaleLang="en" LocaleCountry="" LocaleVariant="" LineColor="#000000" LineWidth="0.3" EdgeRadius="1.0"><LeafMargin Left="1.0" Top="0.3" Right="1.0" Bottom="0.3"></LeafMargin><Branch Length="0.0011405" LineColor="#000000" LineWidth="0.3" ConstantWidth="false" MinLength="4.0" MinSpaceAbove="0.0" MinSpaceBelow="0.0"></Branch></Node><Node Text="Oxyporus japonicus5 CNUIC518" IsDecimal="false" UniqueName="0pf38y0tcb" TextColor="#000000" TextHeight="6.0" TextStyle="" FontFamily="Arial" DecimalFormat="#0.0#####" LocaleLang="en" LocaleCountry="" LocaleVariant="" LineColor="#000000" LineWidth="0.3" EdgeRadius="1.0"><LeafMargin Left="1.0" Top="0.3" Right="1.0" Bottom="0.3"></LeafMargin><Branch Length="0.002557182" LineColor="#000000" LineWidth="0.3" ConstantWidth="false" MinLength="4.0" MinSpaceAbove="0.0" MinSpaceBelow="0.0"></Branch></Node></Node><Node Text="Oxyporus japonicus2 CNUIC610" IsDecimal="false" UniqueName="o4ma7l0sfv" TextColor="#000000" TextHeight="6.0" TextStyle="" FontFamily="Arial" DecimalFormat="#0.0#####" LocaleLang="en" LocaleCountry="" LocaleVariant="" LineColor="#000000" LineWidth="0.3" EdgeRadius="1.0"><LeafMargin Left="1.0" Top="0.3" Right="1.0" Bottom="0.3"></LeafMargin><Branch Length="0.002462125" LineColor="#000000" LineWidth="0.3" ConstantWidth="false" MinLength="4.0" MinSpaceAbove="0.0" MinSpaceBelow="0.0"></Branch></Node><Node Text="internalNode36" IsDecimal="false" UniqueName="m3f4hzv5q7" TextColor="#000000" TextHeight="6.0" TextStyle="" FontFamily="Arial" DecimalFormat="#0.0#####" LocaleLang="en" LocaleCountry="" LocaleVariant="" LineColor="#000000" LineWidth="0.3" EdgeRadius="1.0"><LeafMargin Left="1.0" Top="0.3" Right="1.0" Bottom="0.3"></LeafMargin><Branch Length="0.002507072" LineColor="#000000" LineWidth="0.3" ConstantWidth="false" MinLength="4.0" MinSpaceAbove="0.0" MinSpaceBelow="0.0"><PieChartLabel TextColor="#000000" TextHeight="6.0" TextStyle="" FontFamily="Arial" DecimalFormat="#0.0#####" LocaleLang="en" LocaleCountry="" LocaleVariant="" LineColor="#000000" LineWidth="0.3" Width="6.0" Height="6.0" InternalLines="true" NullLines="false" ShowTitle="false" CaptionType="NONE" CaptionLinkType="STRAIGHT_LINES" Id="17" Above="true" LineNo="0" LinePos="0.0"><LabelMargin Left="1.0" Top="1.0" Right="1.0" Bottom="1.0"></LabelMargin><DataIds TextColor="#000000" TextStyle="" FontFamily="Arial" DecimalFormat="#0.0#####" LocaleLang="en" LocaleCountry="" LocaleVariant=""><DataId PieColor="#0000FF" PieCaption="">17.0</DataId><DataId PieColor="#FF0000" PieCaption="">17.1</DataId></DataIds></PieChartLabel><InvisibleData Id="17.1" Text="0.99995" IsDecimal="true"></InvisibleData><InvisibleData Id="17.0" Text="5.0E-5" IsDecimal="true"></InvisibleData></Branch><Node Text="Oxyporus japonicus4 CNUIC612" IsDecimal="false" UniqueName="k8utd0m8l1" TextColor="#000000" TextHeight="6.0" TextStyle="" FontFamily="Arial" DecimalFormat="#0.0#####" LocaleLang="en" LocaleCountry="" LocaleVariant="" LineColor="#000000" LineWidth="0.3" EdgeRadius="1.0"><LeafMargin Left="1.0" Top="0.3" Right="1.0" Bottom="0.3"></LeafMargin><Branch Length="0.003949345" LineColor="#000000" LineWidth="0.3" ConstantWidth="false" MinLength="4.0" MinSpaceAbove="0.0" MinSpaceBelow="0.0"></Branch></Node><Node Text="Oxyporus japonicus6 CNUIC607" IsDecimal="false" UniqueName="w4040np5ro" TextColor="#000000" TextHeight="6.0" TextStyle="" FontFamily="Arial" DecimalFormat="#0.0#####" LocaleLang="en" LocaleCountry="" LocaleVariant="" LineColor="#000000" LineWidth="0.3" EdgeRadius="1.0"><LeafMargin Left="1.0" Top="0.3" Right="1.0" Bottom="0.3"></LeafMargin><Branch Length="0.001043314" LineColor="#000000" LineWidth="0.3" ConstantWidth="false" MinLength="4.0" MinSpaceAbove="0.0" MinSpaceBelow="0.0"></Branch></Node></Node><Node Text="Oxyporus japonicus8 CNUIC609" IsDecimal="false" UniqueName="0pxatbr661" TextColor="#000000" TextHeight="6.0" TextStyle="" FontFamily="Arial" DecimalFormat="#0.0#####" LocaleLang="en" LocaleCountry="" LocaleVariant="" LineColor="#000000" LineWidth="0.3" EdgeRadius="1.0"><LeafMargin Left="1.0" Top="0.3" Right="1.0" Bottom="0.3"></LeafMargin><Branch Length="0.007091306" LineColor="#000000" LineWidth="0.3" ConstantWidth="false" MinLength="4.0" MinSpaceAbove="0.0" MinSpaceBelow="0.0"></Branch></Node><Node Text="internalNode37" IsDecimal="false" UniqueName="ln9zbp1s8y" TextColor="#000000" TextHeight="6.0" TextStyle="" FontFamily="Arial" DecimalFormat="#0.0#####" LocaleLang="en" LocaleCountry="" LocaleVariant="" LineColor="#000000" LineWidth="0.3" EdgeRadius="1.0"><LeafMargin Left="1.0" Top="0.3" Right="1.0" Bottom="0.3"></LeafMargin><Branch Length="0.003804276" LineColor="#000000" LineWidth="0.3" ConstantWidth="false" MinLength="4.0" MinSpaceAbove="0.0" MinSpaceBelow="0.0"><PieChartLabel TextColor="#000000" TextHeight="6.0" TextStyle="" FontFamily="Arial" DecimalFormat="#0.0#####" LocaleLang="en" LocaleCountry="" LocaleVariant="" LineColor="#000000" LineWidth="0.3" Width="6.0" Height="6.0" InternalLines="true" NullLines="false" ShowTitle="false" CaptionType="NONE" CaptionLinkType="STRAIGHT_LINES" Id="17" Above="true" LineNo="0" LinePos="0.0"><LabelMargin Left="1.0" Top="1.0" Right="1.0" Bottom="1.0"></LabelMargin><DataIds TextColor="#000000" TextStyle="" FontFamily="Arial" DecimalFormat="#0.0#####" LocaleLang="en" LocaleCountry="" LocaleVariant=""><DataId PieColor="#0000FF" PieCaption="">17.0</DataId><DataId PieColor="#FF0000" PieCaption="">17.1</DataId></DataIds></PieChartLabel><InvisibleData Id="17.1" Text="1.0" IsDecimal="true"></InvisibleData><InvisibleData Id="17.0" Text="0.0" IsDecimal="true"></InvisibleData></Branch><Node Text="Oxyporus maxillosus Altay19 14" IsDecimal="false" UniqueName="eniwjs0lcm" TextColor="#000000" TextHeight="6.0" TextStyle="" FontFamily="Arial" DecimalFormat="#0.0#####" LocaleLang="en" LocaleCountry="" LocaleVariant="" LineColor="#000000" LineWidth="0.3" EdgeRadius="1.0"><LeafMargin Left="1.0" Top="0.3" Right="1.0" Bottom="0.3"></LeafMargin><Branch Length="0.001031708" LineColor="#000000" LineWidth="0.3" ConstantWidth="false" MinLength="4.0" MinSpaceAbove="0.0" MinSpaceBelow="0.0"></Branch></Node><Node Text="Oxyporus maxillosus Altay19 50b 15" IsDecimal="false" UniqueName="z73muu0gtg" TextColor="#000000" TextHeight="6.0" TextStyle="" FontFamily="Arial" DecimalFormat="#0.0#####" LocaleLang="en" LocaleCountry="" LocaleVariant="" LineColor="#000000" LineWidth="0.3" EdgeRadius="1.0"><LeafMargin Left="1.0" Top="0.3" Right="1.0" Bottom="0.3"></LeafMargin><Branch Length="0.002400905" LineColor="#000000" LineWidth="0.3" ConstantWidth="false" MinLength="4.0" MinSpaceAbove="0.0" MinSpaceBelow="0.0"></Branch></Node><Node Text="Oxyporus maxillosus Buryatia19 12" IsDecimal="false" UniqueName="h50lbl08xl" TextColor="#000000" TextHeight="6.0" TextStyle="" FontFamily="Arial" DecimalFormat="#0.0#####" LocaleLang="en" LocaleCountry="" LocaleVariant="" LineColor="#000000" LineWidth="0.3" EdgeRadius="1.0"><LeafMargin Left="1.0" Top="0.3" Right="1.0" Bottom="0.3"></LeafMargin><Branch Length="0.00101337" LineColor="#000000" LineWidth="0.3" ConstantWidth="false" MinLength="4.0" MinSpaceAbove="0.0" MinSpaceBelow="0.0"></Branch></Node><Node Text="Oxyporus maxillosus Ch Mans 05" IsDecimal="false" UniqueName="en1vjxqpsw" TextColor="#000000" TextHeight="6.0" TextStyle="" FontFamily="Arial" DecimalFormat="#0.0#####" LocaleLang="en" LocaleCountry="" LocaleVariant="" LineColor="#000000" LineWidth="0.3" EdgeRadius="1.0"><LeafMargin Left="1.0" Top="0.3" Right="1.0" Bottom="0.3"></LeafMargin><Branch Length="0.001028518" LineColor="#000000" LineWidth="0.3" ConstantWidth="false" MinLength="4.0" MinSpaceAbove="0.0" MinSpaceBelow="0.0"></Branch></Node><Node Text="Oxyporus maxillosus Ch Mans 22" IsDecimal="false" UniqueName="48zo0opf7b" TextColor="#000000" TextHeight="6.0" TextStyle="" FontFamily="Arial" DecimalFormat="#0.0#####" LocaleLang="en" LocaleCountry="" LocaleVariant="" LineColor="#000000" LineWidth="0.3" EdgeRadius="1.0"><LeafMargin Left="1.0" Top="0.3" Right="1.0" Bottom="0.3"></LeafMargin><Branch Length="0.00207992" LineColor="#000000" LineWidth="0.3" ConstantWidth="false" MinLength="4.0" MinSpaceAbove="0.0" MinSpaceBelow="0.0"></Branch></Node><Node Text="Oxyporus maxillosus Czech16 23" IsDecimal="false" UniqueName="9bia99rc2o" TextColor="#000000" TextHeight="6.0" TextStyle="" FontFamily="Arial" DecimalFormat="#0.0#####" LocaleLang="en" LocaleCountry="" LocaleVariant="" LineColor="#000000" LineWidth="0.3" EdgeRadius="1.0"><LeafMargin Left="1.0" Top="0.3" Right="1.0" Bottom="0.3"></LeafMargin><Branch Length="0.003750069" LineColor="#000000" LineWidth="0.3" ConstantWidth="false" MinLength="4.0" MinSpaceAbove="0.0" MinSpaceBelow="0.0"></Branch></Node><Node Text="Oxyporus maxillosus Irkutsk95 19 175" IsDecimal="false" UniqueName="yia3li93j1" TextColor="#000000" TextHeight="6.0" TextStyle="" FontFamily="Arial" DecimalFormat="#0.0#####" LocaleLang="en" LocaleCountry="" LocaleVariant="" LineColor="#000000" LineWidth="0.3" EdgeRadius="1.0"><LeafMargin Left="1.0" Top="0.3" Right="1.0" Bottom="0.3"></LeafMargin><Branch Length="0.001882188" LineColor="#000000" LineWidth="0.3" ConstantWidth="false" MinLength="4.0" MinSpaceAbove="0.0" MinSpaceBelow="0.0"></Branch></Node><Node Text="Oxyporus maxillosus Sverdl19 24" IsDecimal="false" UniqueName="fzh3e9js9s" TextColor="#000000" TextHeight="6.0" TextStyle="" FontFamily="Arial" DecimalFormat="#0.0#####" LocaleLang="en" LocaleCountry="" LocaleVariant="" LineColor="#000000" LineWidth="0.3" EdgeRadius="1.0"><LeafMargin Left="1.0" Top="0.3" Right="1.0" Bottom="0.3"></LeafMargin><Branch Length="0.001031678" LineColor="#000000" LineWidth="0.3" ConstantWidth="false" MinLength="4.0" MinSpaceAbove="0.0" MinSpaceBelow="0.0"></Branch></Node></Node><Node Text="Oxyporus maxillosus AnisimFE19 28" IsDecimal="false" UniqueName="qzce2s5iqx" TextColor="#000000" TextHeight="6.0" TextStyle="" FontFamily="Arial" DecimalFormat="#0.0#####" LocaleLang="en" LocaleCountry="" LocaleVariant="" LineColor="#000000" LineWidth="0.3" EdgeRadius="1.0"><LeafMargin Left="1.0" Top="0.3" Right="1.0" Bottom="0.3"></LeafMargin><Branch Length="0.001041284" LineColor="#000000" LineWidth="0.3" ConstantWidth="false" MinLength="4.0" MinSpaceAbove="0.0" MinSpaceBelow="0.0"></Branch></Node><Node Text="Oxyporus maxillosus GornTaezhFE18" IsDecimal="false" UniqueName="17g0w86wdn" TextColor="#000000" TextHeight="6.0" TextStyle="" FontFamily="Arial" DecimalFormat="#0.0#####" LocaleLang="en" LocaleCountry="" LocaleVariant="" LineColor="#000000" LineWidth="0.3" EdgeRadius="1.0"><LeafMargin Left="1.0" Top="0.3" Right="1.0" Bottom="0.3"></LeafMargin><Branch Length="0.001059361" LineColor="#000000" LineWidth="0.3" ConstantWidth="false" MinLength="4.0" MinSpaceAbove="0.0" MinSpaceBelow="0.0"></Branch></Node><Node Text="Oxyporus maxillosus GornTaezhFE18 03" IsDecimal="false" UniqueName="cosqyt4cie" TextColor="#000000" TextHeight="6.0" TextStyle="" FontFamily="Arial" DecimalFormat="#0.0#####" LocaleLang="en" LocaleCountry="" LocaleVariant="" LineColor="#000000" LineWidth="0.3" EdgeRadius="1.0"><LeafMargin Left="1.0" Top="0.3" Right="1.0" Bottom="0.3"></LeafMargin><Branch Length="0.002364423" LineColor="#000000" LineWidth="0.3" ConstantWidth="false" MinLength="4.0" MinSpaceAbove="0.0" MinSpaceBelow="0.0"></Branch></Node><Node Text="Oxyporus maxillosus GornTaezhFE18 37" IsDecimal="false" UniqueName="kr6rxn8jqw" TextColor="#000000" TextHeight="6.0" TextStyle="" FontFamily="Arial" DecimalFormat="#0.0#####" LocaleLang="en" LocaleCountry="" LocaleVariant="" LineColor="#000000" LineWidth="0.3" EdgeRadius="1.0"><LeafMargin Left="1.0" Top="0.3" Right="1.0" Bottom="0.3"></LeafMargin><Branch Length="9.97839E-4" LineColor="#000000" LineWidth="0.3" ConstantWidth="false" MinLength="4.0" MinSpaceAbove="0.0" MinSpaceBelow="0.0"></Branch></Node><Node Text="Oxyporus maxillosus larvaGornTaezhFE18" IsDecimal="false" UniqueName="3wl5rpam5w" TextColor="#000000" TextHeight="6.0" TextStyle="" FontFamily="Arial" DecimalFormat="#0.0#####" LocaleLang="en" LocaleCountry="" LocaleVariant="" LineColor="#000000" LineWidth="0.3" EdgeRadius="1.0"><LeafMargin Left="1.0" Top="0.3" Right="1.0" Bottom="0.3"></LeafMargin><Branch Length="0.001009975" LineColor="#000000" LineWidth="0.3" ConstantWidth="false" MinLength="4.0" MinSpaceAbove="0.0" MinSpaceBelow="0.0"></Branch></Node></Node><Node Text="Oxyporus japonicus3 CNUIC611" IsDecimal="false" UniqueName="6dppb09z30" TextColor="#000000" TextHeight="6.0" TextStyle="" FontFamily="Arial" DecimalFormat="#0.0#####" LocaleLang="en" LocaleCountry="" LocaleVariant="" LineColor="#000000" LineWidth="0.3" EdgeRadius="1.0"><LeafMargin Left="1.0" Top="0.3" Right="1.0" Bottom="0.3"></LeafMargin><Branch Length="0.003965777" LineColor="#000000" LineWidth="0.3" ConstantWidth="false" MinLength="4.0" MinSpaceAbove="0.0" MinSpaceBelow="0.0"></Branch></Node><Node Text="Oxyporus japonicus7 CNUIC608" IsDecimal="false" UniqueName="zflrgc0a4o" TextColor="#000000" TextHeight="6.0" TextStyle="" FontFamily="Arial" DecimalFormat="#0.0#####" LocaleLang="en" LocaleCountry="" LocaleVariant="" LineColor="#000000" LineWidth="0.3" EdgeRadius="1.0"><LeafMargin Left="1.0" Top="0.3" Right="1.0" Bottom="0.3"></LeafMargin><Branch Length="0.002555539" LineColor="#000000" LineWidth="0.3" ConstantWidth="false" MinLength="4.0" MinSpaceAbove="0.0" MinSpaceBelow="0.0"></Branch></Node><Node Text="Oxyporus japonicus9 CNUIC631" IsDecimal="false" UniqueName="nermhxii7z" TextColor="#000000" TextHeight="6.0" TextStyle="" FontFamily="Arial" DecimalFormat="#0.0#####" LocaleLang="en" LocaleCountry="" LocaleVariant="" LineColor="#000000" LineWidth="0.3" EdgeRadius="1.0"><LeafMargin Left="1.0" Top="0.3" Right="1.0" Bottom="0.3"></LeafMargin><Branch Length="9.993379E-4" LineColor="#000000" LineWidth="0.3" ConstantWidth="false" MinLength="4.0" MinSpaceAbove="0.0" MinSpaceBelow="0.0"></Branch></Node></Node></Node></Node></Node></Node></Node></Node></Node><ScaleBar LineColor="#000000" LineWidth="0.3" TextColor="#000000" TextHeight="4.0" TextStyle="" FontFamily="Arial" DecimalFormat="#0.0#####" LocaleLang="en" LocaleCountry="" LocaleVariant="" Align="left" TreeDistance="2.0" Width="20.0mm" Height="3.0" SmallInterval="0.003" LongInterval="10" StartLeft="true" Increasing="true"></ScaleBar></Tree></TreegraphDocument>
